# Supplementary material for: Triazolyl-phosphole and triazolyl-azaphosphole: synthesis, transition metal complexes and catalytic studies
Source: Royal Society of Chemistry journal article supplement (doi:10.1039/d4dt03213f), 2024-12-27
Supplement: d4dt03213f1.pdf [file d4dt03213f1.pdf]

## Supporting Information

### **Triazolyl-phosphole and triazolyl-azaphosphole: Synthesis, Transition Metal Complexes and Catalytic Studies**

Latchupatula Radhakrishna, Basvaraj S. Kote, Rani Gourkhede, Ankit Pandey, Bhupinder Kaur  
and Maravanji S. Balakrishna\*

Phosphorus Laboratory, Department of Chemistry, Indian Institute of Technology Bombay,  
Powai, Mumbai 400076, India.

\*Author to whom correspondence should be addressed. E-mail: [krishna@chem.iitb.ac.in](mailto:krishna@chem.iitb.ac.in),  
[msb\\_krishna@iitb.ac.in](mailto:msb_krishna@iitb.ac.in) (M. S. Balakrishna); Fax: +91-22-5172-3480/2576-7152

## Table of Content

|   |                                                                                                                               | Page No |
|---|-------------------------------------------------------------------------------------------------------------------------------|---------|
| 1 | Crystallographic information for compounds <b>L1</b> , <b>L2</b> , <b>1</b> , <b>2</b> , <b>3</b> , <b>5</b> , and <b>7</b>   | S3-S5   |
| 2 | Molecular structures of <b>3</b> and <b>5</b>                                                                                 | S5-S7   |
| 3 | NMR spectral data for catalytic products                                                                                      | S7-S9   |
| 4 | NMR, HRMS and FT-IR spectra of compounds <b>L1</b> , <b>L2</b> , <b>L1<sub>0</sub></b> , <b>L2<sub>0</sub></b> and <b>1-7</b> | S10-S33 |
| 5 | Controlled Experiment                                                                                                         | S33-S36 |
| 6 | NMR spectra of catalytic products                                                                                             | S37-S48 |
| 7 | References                                                                                                                    | S49     |

**Crystallographic information for compounds L1, L2, 1, 2, 3, 5, and 7****Table S1. Crystallographic data for compounds L1, L2, and 1.**

|                                    | <b>L1</b>                                        | <b>L2</b>                                        | <b>1</b>                                                           |
|------------------------------------|--------------------------------------------------|--------------------------------------------------|--------------------------------------------------------------------|
| Formula                            | C <sub>20</sub> H <sub>14</sub> N <sub>3</sub> P | C <sub>20</sub> H <sub>14</sub> N <sub>3</sub> P | C <sub>31</sub> H <sub>30</sub> Cl <sub>4</sub> N <sub>3</sub> PRu |
| Formula weight                     | 327.31                                           | 327.31                                           | 718.42                                                             |
| Temperature/K                      | 150                                              | 150                                              | 150.15                                                             |
| Crystal system                     | Triclinic                                        | Monoclinic                                       | Triclinic                                                          |
| Space group                        | P-1                                              | P2 <sub>1</sub> /c                               | P-1                                                                |
| a/Å                                | 9.1297(3)                                        | 11.9213(8)                                       | 9.3109(7)                                                          |
| b/Å                                | 9.3832(4)                                        | 8.1536(6)                                        | 10.3812(8)                                                         |
| c/Å                                | 11.0431(4)                                       | 16.1780(11)                                      | 16.2248(10)                                                        |
| α/°                                | 112.436(4)                                       | 90                                               | 88.026(6)                                                          |
| β/°                                | 95.007(3)                                        | 91.743(6)                                        | 82.589(6)                                                          |
| γ/°                                | 109.940(4)                                       | 90                                               | 77.993(6)                                                          |
| Volume/Å <sup>3</sup>              | 795.83(6)                                        | 1571.80(19)                                      | 1521.09(19)                                                        |
| Z                                  | 2                                                | 4                                                | 2                                                                  |
| ρ <sub>calc</sub> /cm <sup>3</sup> | 1.366                                            | 1.383                                            | 1.569                                                              |
| F(000)                             | 340                                              | 680                                              | 728                                                                |
| crystal size, mm <sup>3</sup>      | 0.18×0.12×0.085                                  | 0.123×0.076×0.021                                | 0.141×0.021×0.012                                                  |
| μ (MoKα), mm <sup>-1</sup>         | 0.178                                            | 0.180                                            | 0.946                                                              |
| 2θ range, deg                      | 4.122 to 62.256                                  | 5.038 to 62.444                                  | 4.012 to 71.62                                                     |
| Total no. reflns                   | 21476                                            | 22157                                            | 58324                                                              |
| No. of indep reflns                | 4719                                             | 4757                                             | 11099                                                              |
| S                                  | 1.051                                            | 1.026                                            | 1.051                                                              |
| R <sub>1</sub>                     | 0.0535                                           | 0.0767                                           | 0.0623                                                             |
| wR <sub>2</sub>                    | 0.1227                                           | 0.1658                                           | 0.1297                                                             |

**Table S2. Crystallographic data for complexes 2, 3, 5 and 7.**

|                                         | <b>2</b>                                                           | <b>3</b>                                                                         | <b>5</b>                                                           | <b>7</b>                                                                                      |
|-----------------------------------------|--------------------------------------------------------------------|----------------------------------------------------------------------------------|--------------------------------------------------------------------|-----------------------------------------------------------------------------------------------|
| Formula                                 | C <sub>30</sub> H <sub>28</sub> Cl <sub>2</sub> N <sub>3</sub> PRu | C <sub>40</sub> H <sub>28</sub> N <sub>6</sub> P <sub>2</sub> Cl <sub>2</sub> Pd | C <sub>25</sub> H <sub>18</sub> Cl <sub>3</sub> N <sub>3</sub> PPd | C <sub>40</sub> H <sub>30</sub> N <sub>6</sub> Au <sub>2</sub> P <sub>2</sub> Cl <sub>2</sub> |
| Formula weight                          | 633.49                                                             | 831.92                                                                           | 604.14                                                             | 1121.47                                                                                       |
| Temperature/K                           | 150                                                                | 150.00(10)                                                                       | 100.00(10)                                                         | 293(2)                                                                                        |
| Crystal system                          | Triclinic                                                          | Triclinic                                                                        | triclinic                                                          | Monoclinic                                                                                    |
| Space group                             | P-1                                                                | P-1                                                                              | P-1                                                                | C2                                                                                            |
| a/Å                                     | 10.2927(8)                                                         | 9.6508(5)                                                                        | 8.33190(10)                                                        | 17.1377(3)                                                                                    |
| b/Å                                     | 13.3095(13)                                                        | 11.5561(5)                                                                       | 11.7527(2)                                                         | 15.0169(2)                                                                                    |
| c/Å                                     | 13.9289(10)                                                        | 16.7565(8)                                                                       | 13.4917(2)                                                         | 15.2437(3)                                                                                    |
| $\alpha$ /°                             | 68.908(8)                                                          | 79.867(4)                                                                        | 97.1240(10)                                                        | 90                                                                                            |
| $\beta$ /°                              | 78.503(6)                                                          | 81.712(4)                                                                        | 98.6400(10)                                                        | 109.761(2)                                                                                    |
| $\gamma$ /°                             | 69.443(8)                                                          | 71.704(4)                                                                        | 110.6210(10)                                                       | 90                                                                                            |
| Volume/Å <sup>3</sup>                   | 1661.1(3)                                                          | 1738.71(15)                                                                      | 1199.91(3)                                                         | 3692.02(12)                                                                                   |
| Z                                       | 2                                                                  | 2                                                                                | 2                                                                  | 4                                                                                             |
| $\rho_{\text{calc}}/\text{cm}^3$        | 1.267                                                              | 1.589                                                                            | 1.672                                                              | 2.018                                                                                         |
| F(000)                                  | 644.0                                                              | 840.0                                                                            | 602.0                                                              | 2136.0                                                                                        |
| crystal size, mm                        | 0.132×0.123×0.0042                                                 | 0.19×0.17×0.057                                                                  | 0.17×0.16×0.063                                                    | 0.21×0.17×0.057                                                                               |
| $\mu$ (MoK $\alpha$ ), mm <sup>-1</sup> | 0.702                                                              | 0.820                                                                            | 1.194                                                              | 8.209                                                                                         |
| 2 $\theta$ range, deg                   | 3.144 to 72.454                                                    | 3.748 to 71.422                                                                  | 3.11 to 61.442                                                     | 3.706 to 62.4                                                                                 |
| Total no. reflns                        | 61031                                                              | 88367                                                                            | 9231                                                               | 56096                                                                                         |
| No. of indep reflns                     | 11955                                                              | 13002                                                                            | 5351                                                               | 11094                                                                                         |
| S                                       | 1.075                                                              | 1.036                                                                            | 1.187                                                              | 1.047                                                                                         |
| R <sub>I</sub>                          | 0.1634                                                             | 0.0935                                                                           | 0.0365                                                             | 0.0590                                                                                        |
| wR <sub>2</sub>                         | 0.3606                                                             | 0.1904                                                                           | 0.1033                                                             | 0.1536                                                                                        |

\* The single-crystal X-ray diffraction data for complexes **2**, **3**, **5**, and **7** does not meet the standards required for publication. However, the structures were confirmed without any

ambiguity by spectroscopic and X-ray data. Structures of complexes 2,3,5 and 7 are described in the supporting information.

**Molecular structures of *trans*-[(PdCl<sub>2</sub>){L1- $\kappa^1$ -P}<sub>2</sub>] (3) and [{Pd( $\eta^3$ -C<sub>3</sub>H<sub>5</sub>)Cl}{C<sub>6</sub>H<sub>5</sub>(1,2,3-N<sub>3</sub>CC<sub>6</sub>H<sub>4</sub>C(PPh))- $\kappa^1$ -P}] (5)**

The perspective view of the molecular structures of complexes 3 and 5 is shown in Fig. 3; the selected bond lengths and angles are listed in figure captions in Fig. 3. The metal center in these complexes adopts slightly distorted square planar geometry. The Pd–P and Pd–Cl bond distances of 2.303(3) and 2.283(3) Å in 3 are similar to those in complexes [PdCl<sub>2</sub>{(DippNH-PPh<sub>2</sub>)<sub>2</sub>}- $\kappa^1$ -P]<sup>1</sup> and *trans*-[PdCl<sub>2</sub>(PPh<sub>3</sub>)<sub>2</sub>].<sup>2</sup> The molecular structure of 5 shows a C–H··· $\pi$  interaction between the aromatic proton of one of the phenyl rings and the *ipso* carbon of the PPh moiety (H14···C14 2.816 Å). In addition, complex 5 also displays a C–H···M interaction (H20···Pd1 3.270 Å) between the *sp*<sup>2</sup> hydrogen of the phenyl sidearm of triazole and the palladium center.

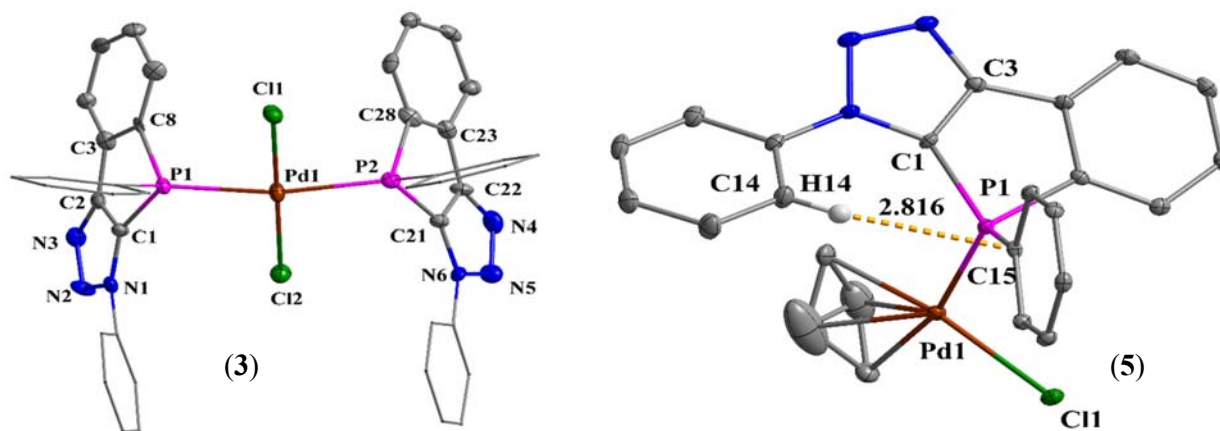

**Fig. S1** The molecular structures of *trans*-[(PdCl<sub>2</sub>)(L1- $\kappa^1$ -P)<sub>2</sub>] (3) and [{Pd( $\eta^3$ -C<sub>3</sub>H<sub>5</sub>)Cl}{L2- $\kappa^1$ -P}] (5). All hydrogen atoms are omitted for clarity. Displacement ellipsoids are drawn at the 50% probability level. Selected bond lengths (Å) and bond angles (°): For complex 3: C1–P1 1.793(9), C8–P1 1.840(10), P1–Pd1 2.298(3), P2–Pd1 2.303(3), Pd1–Cl1 2.312(3), Pd2–Cl2 2.283(3), C1–P1–Pd1 119.0(4), P1–Pd1–P2 166.88(10), Cl1–Pd1–Cl2 176.37(11). For

complex **5**: C1–P1 1.810(4), C15–P1 1.817(4), C8–P1 1.834(4), P1–Pd1 2.2780(11), Pd1–Cl1 2.3869(11), C1–P1–C15 105.0(2), C1–P1–Pd1 118.92(14), P1–Pd1–Cl1 96.58(4).

**Molecular structure of [(AuCl){L1- $\kappa^1$ -P}] (7)**

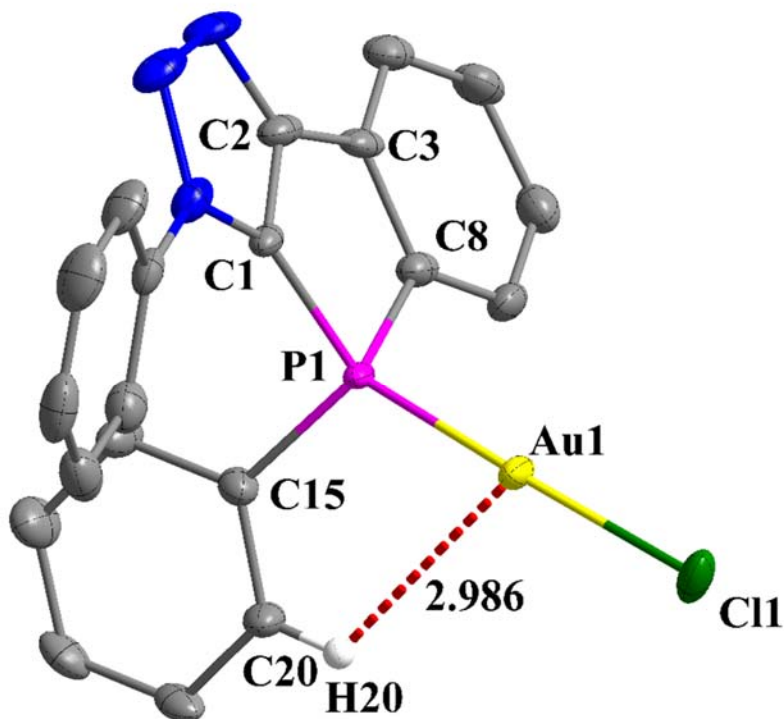

**Fig. S2** The molecular structure of [(AuCl){L1- $\kappa^1$ -P}] (7). All hydrogen atoms are omitted for clarity. Selected bond lengths (Å) and bond angles (°): C1–P1 1.790(7), Au1–P1 2.216(2), Au1–Cl1 2.288(2), P1–C15 1.817(8), P1–C8 1.848(8), C1–P1–C15 105.7(4), C1–P1–C8 89.5(4), C15–P1–C8 106.5(4), Cl1–Au1–P1 171.16(8).

The crystals of **7** suitable for single-crystal X-ray diffraction study were obtained by crystallizing in 1:1 mixture of chloroform and petroleum ether at room temperature over 36 h. The molecular structure of **7** along with selected bond distances and bond angles is shown in Fig. 4. The Au<sup>I</sup> center adopts linear geometry with a bond angle of 178.35(2)° (P1–Au1–Cl1). The Au1–P1 and Au1–Cl1 bond distances 2.2279(5) and 2.2741(6) Å in **7** are in the range

found in analogous complexes.<sup>3</sup> The ortho-hydrogen of phenyl group from PPh moiety is in close proximity to Au atom with a H20...Au1 distance of 2.985 Å.

---

### NMR spectral data of catalytic products of Ru(II) catalysed benzylic oxidation reaction

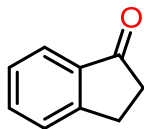

1-indanone (**1a**): Purified by column chromatography on silica gel using petroleum ether and ethyl acetate as eluents, 90 % (118 mg) yield as white solid. <sup>1</sup>H NMR (500 MHz, CDCl<sub>3</sub>): δ 7.76 (d, *J* = 7.7 Hz, 1H), 7.58 (td, *J* = 7.5, 1.2 Hz, 1H), 7.48 (dt, *J* = 7.7, 1.0 Hz, 1H), 7.38 – 7.35 (m, 1H), 3.19 – 3.11 (m, 2H), 2.72 – 2.65 (m, 2H). <sup>13</sup>C NMR (126 MHz, CDCl<sub>3</sub>): δ 207.2, 155.2, 134.6, 128.3, 127.3, 126.7, 123.8, 36.2, 25.8.

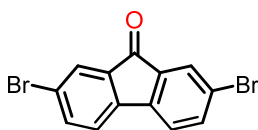

2,7-dibromo-9H-fluoren-9-one (**1b**). Purified by column chromatography on silica gel using petroleum ether and ethyl acetate as eluents, 92 % (310.95 mg) yield as yellow solid. <sup>1</sup>H NMR (400 MHz, CDCl<sub>3</sub>): δ 7.73 (d, *J* = 5.3 Hz, 2H), 7.66 – 7.55 (m, 2H), 7.44 – 7.28 (m, 2H). <sup>13</sup>C NMR (101 MHz, CDCl<sub>3</sub>): δ 191.0, 142.4, 137.6, 135.4, 128.0, 123.5, 122.0.

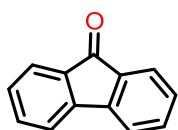

9H-fluoren-9-one (**1c**). Purified by column chromatography on silica gel using petroleum ether and ethyl acetate as eluents, 94 % (169.39 mg) yield as yellow solid. <sup>1</sup>H NMR (500 MHz, CDCl<sub>3</sub>): δ 7.66 – 7.61 (m, 2H), 7.50 – 7.41 (m, 4H), 7.27 (td, *J* = 7.0, 1.8 Hz, 2H). <sup>13</sup>C NMR (126 MHz, CDCl<sub>3</sub>): δ 193.9, 144.4, 134.7, 134.2, 129.1, 124.3, 120.3.

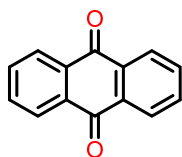

Anthracene-9,10-dione (**1d**). Purified by column chromatography on silica gel using petroleum ether and ethyl acetate as eluents, 88 % (183.23 mg) yield as white solid. <sup>1</sup>H NMR (500 MHz, CDCl<sub>3</sub>): δ 8.32 (dd, *J* = 5.7, 3.3 Hz, 4H), 7.80 (dd, *J* = 5.8, 3.3 Hz, 4H). <sup>13</sup>C NMR (126 MHz, CDCl<sub>3</sub>): δ 183.3, 134.3, 133.7, 127.4.

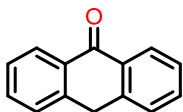

Anthracen-9(10H)-one (**1e**). Purified by column chromatography on silica gel using petroleum ether and ethyl acetate as eluents, 75 % (145.67 mg) yield as white solid.  $^1\text{H}$  NMR (500 MHz,  $\text{CDCl}_3$ ):  $\delta$  8.46 – 8.25 (m, 2H), 7.56 (ddd,  $J = 7.6, 5.6, 2.2$  Hz, 2H), 7.50 – 7.38 (m, 4H), 4.41 – 4.17 (m, 2H).  $^{13}\text{C}$  NMR (126 MHz,  $\text{CDCl}_3$ ):  $\delta$  184.3, 140.5, 132.8, 132.1, 127.6 (d,  $J = 2.2$  Hz), 127.1, 32.3.

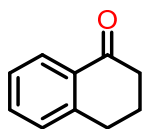

3,4-dihydronaphthalen-1(2H)-one (**1f**). Purified by column chromatography on silica gel using petroleum ether and ethyl acetate as eluents, 94 % (137.41 mg) yield as a colorless liquid.  $^1\text{H}$  NMR (500 MHz,  $\text{CDCl}_3$ ):  $\delta$  7.46 (s, 1H), 7.37 – 7.28 (m, 1H), 7.25 (d,  $J = 7.7$  Hz, 2H), 2.69 – 2.61 (m, 6H).  $^{13}\text{C}$  NMR (126 MHz,  $\text{CDCl}_3$ ):  $\delta$  198.8, 144.6, 134.8, 132.5, 128.8, 127.2, 126.6, 39.1, 29.7, 23.3.

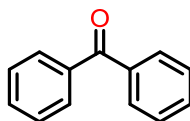

Benzophenone (**1g**). Purified by column chromatography on silica gel using petroleum ether and ethyl acetate as eluents, 99 % (180.39 mg) yield as white solid.  $^1\text{H}$  NMR (500 MHz,  $\text{CDCl}_3$ ):  $\delta$  7.81 (dd,  $J = 8.3, 1.4$  Hz, 4H), 7.58 (s, 2H), 7.48 (t,  $J = 7.7$  Hz, 4H).  $^{13}\text{C}$  NMR (126 MHz,  $\text{CDCl}_3$ ):  $\delta$  196.8, 137.7, 132.5, 130.1, 128.4.

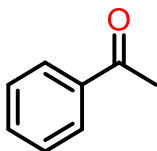

Acetophenone (**1h**). Purified by column chromatography on silica gel using petroleum ether and ethyl acetate as eluents, 61 % (73.29 mg) yield as a colourless liquid.  $^1\text{H}$  NMR (500 MHz,  $\text{CDCl}_3$ ):  $\delta$  8.02 – 7.86 (m, 1H), 7.51 (dddq,  $J = 7.1, 4.4, 3.1, 1.5$  Hz, 1H), 7.45 – 7.35 (m, 1H), 2.59 – 2.51 (m, 2H).  $^{13}\text{C}$  NMR (126 MHz,  $\text{CDCl}_3$ ):  $\delta$  198.0, 137.1, 133.1, 128.4 (d,  $J = 35.0$  Hz), 26.5.

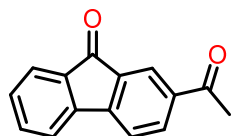

2-acetyl-9H-fluoren-9-one (**1i**). Purified by column chromatography on silica gel using petroleum ether and ethyl acetate as eluents, 95 % (211.12 mg) yield as yellow solid.  $^1\text{H}$  NMR (500 MHz,  $\text{CDCl}_3$ ):  $\delta$  8.27 – 8.15 (m, 1H), 8.16 – 8.12 (m, 1H), 7.73 – 7.67 (m, 1H), 7.60 (tdd,  $J = 7.2, 5.7, 2.9$  Hz, 2H), 7.56 – 7.50 (m, 1H), 7.37 (ddd,  $J = 10.8, 5.4, 2.6$  Hz, 1H), 2.63 (s, 3H).  $^{13}\text{C}$  NMR (126 MHz,  $\text{CDCl}_3$ ):  $\delta$  196.7, 192.8, 148.6, 143.4, 138.0, 135.1 (d,  $J = 17.1$  Hz), 134.5, 130.4, 124.8, 124.3, 121.4, 120.6, 26.8.



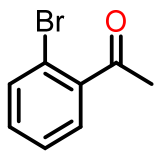

1-(2-bromophenyl)ethan-1-one (**1l**). Purified by column chromatography on silica gel using petroleum ether and ethyl acetate as eluents, 44 % (87.58 mg) yield as a colorless liquid.  $^1\text{H}$  NMR (400 MHz,  $\text{CDCl}_3$ ):  $\delta$  7.64 (ddt,  $J = 7.3, 3.5, 1.6$  Hz, 1H), 7.31 (dt,  $J = 7.6, 1.9$  Hz, 1H), 7.25 – 7.14 (m, 2H), 2.57 – 2.47 (m, 3H).  $^{13}\text{C}$  NMR (101 MHz,  $\text{CDCl}_3$ ):  $\delta$  201.4, 138.3, 137.4, 131.9, 129.3, 125.6, 21.5.

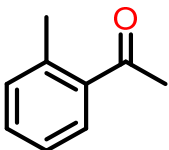

1-(o-tolyl)ethan-1-one (**1m**). Purified by column chromatography on silica gel using petroleum ether and ethyl acetate as eluents, 44 % (59.03 mg) yield as a colourless liquid.  $^1\text{H}$  NMR (400 MHz,  $\text{CDCl}_3$ ):  $\delta$  7.68 – 7.60 (m, 1H), 7.32 (s, 1H), 7.25 – 7.14 (m, 2H), 2.52 (s, 3H), 2.49 (s, 3H).  $^{13}\text{C}$  NMR (101 MHz,  $\text{CDCl}_3$ ):  $\delta$  201.4, 138.3, 137.4, 131.9, 131.4, 129.3, 125.6, 29.3, 21.5.

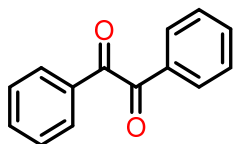

Benzil: (**1n**). Purified by column chromatography on silica gel using petroleum ether and ethyl acetate as eluents, 56 % (117.72 mg) yield as white solid.  $^1\text{H}$  NMR (400 MHz,  $\text{CDCl}_3$ ):  $\delta$  7.98 (dd,  $J = 8.3, 1.4$  Hz, 3H), 7.71 – 7.62 (m, 2H), 7.57 – 7.46 (m, 4H).  $^{13}\text{C}$  NMR (101 MHz,  $\text{CDCl}_3$ ):  $\delta$  194.7, 135.0, 133.1, 130.0, 129.2.

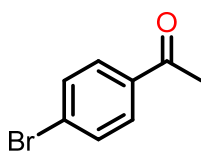

1-(4-bromophenyl)ethan-1-one (**1o**). Purified by column chromatography on silica gel using petroleum ether and ethyl acetate as eluents, 52 % (103.50 mg) yield as a colourless liquid.  $^1\text{H}$  NMR (500 MHz,  $\text{CDCl}_3$ ):  $\delta$  8.01 – 7.77 (m, 2H), 7.75 – 7.50 (m, 2H), 2.64 (s, 3H).  $^{13}\text{C}$  NMR (126 MHz,  $\text{CDCl}_3$ ):  $\delta$  197.1, 135.9, 132.0 (d,  $J = 3.0$  Hz), 130.0 (d,  $J = 3.3$  Hz), 128.4, 26.7.

# NMR, HRMS and FT-IR spectra of compounds 1-10

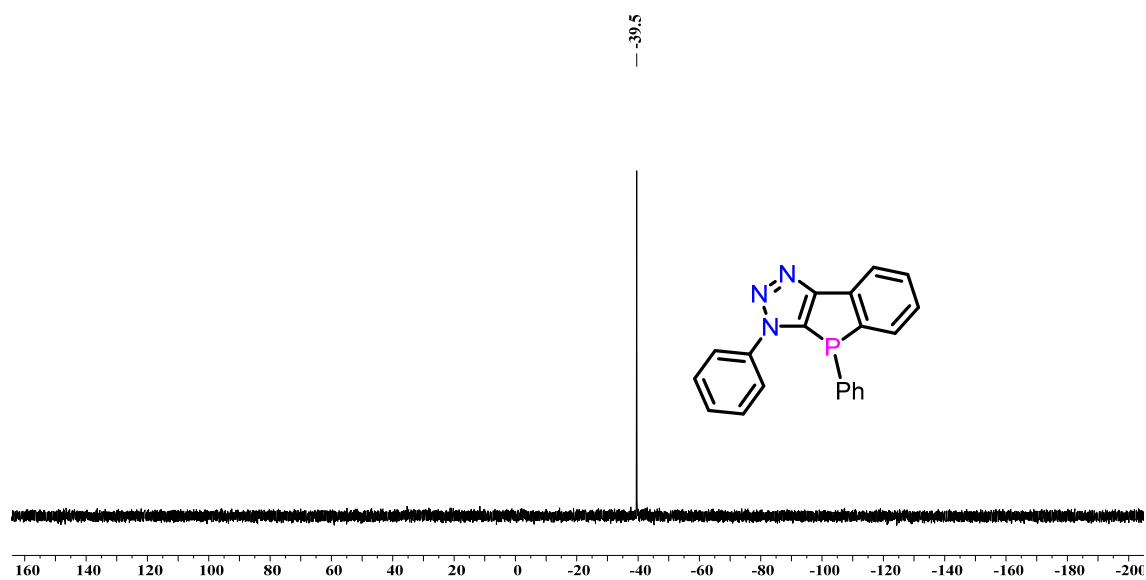

Fig. S3  $^{31}\text{P}\{^1\text{H}\}$  NMR spectrum of L1 in  $\text{CDCl}_3$  (162 MHz).

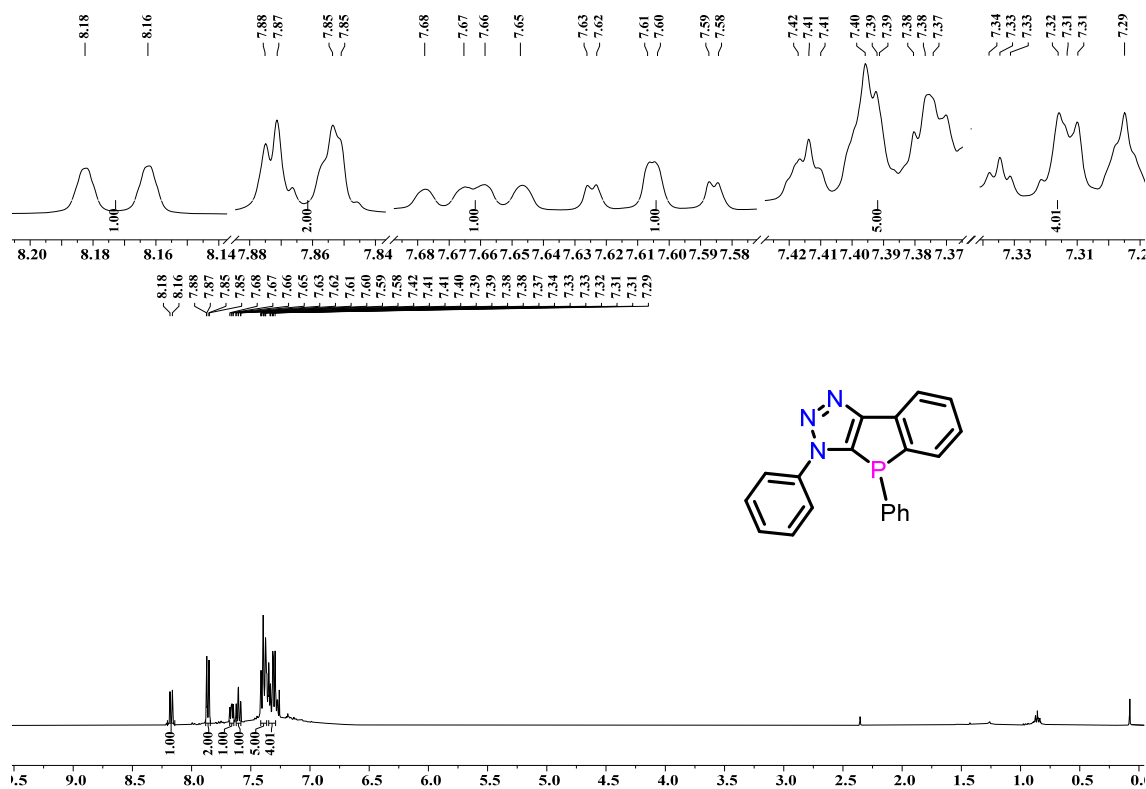

Fig. S4  $^1\text{H}$  NMR spectrum of L1 in  $\text{CDCl}_3$  (400 MHz).

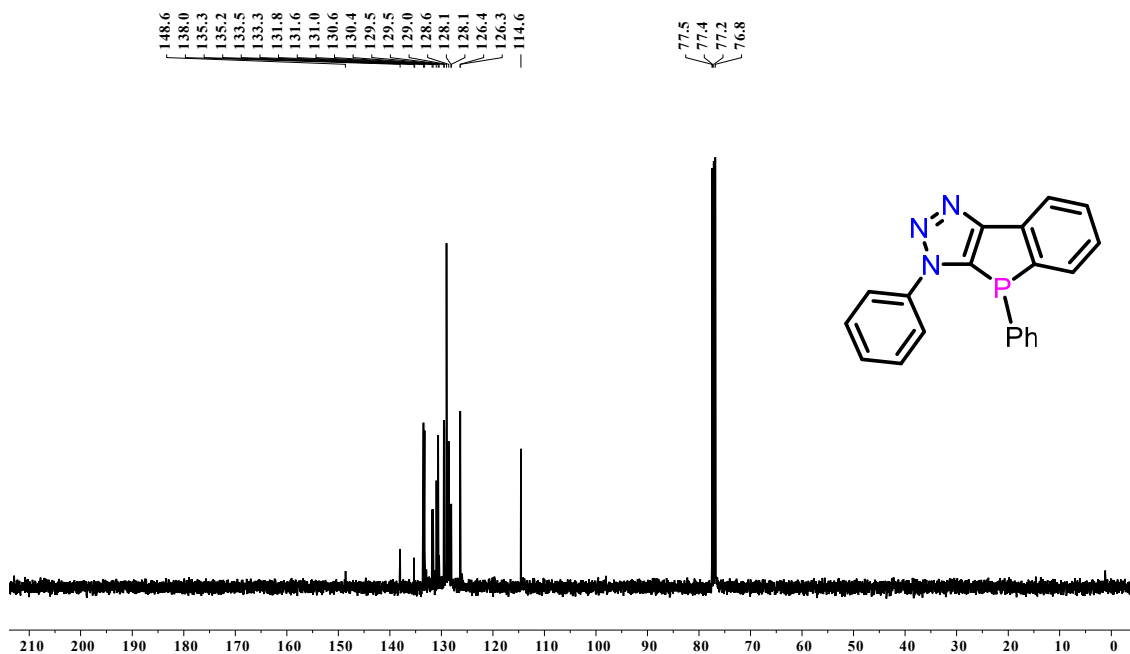

Fig. S5  $^{13}\text{C}\{^1\text{H}\}$  NMR spectrum of L1 in  $\text{CDCl}_3$  (101 MHz).

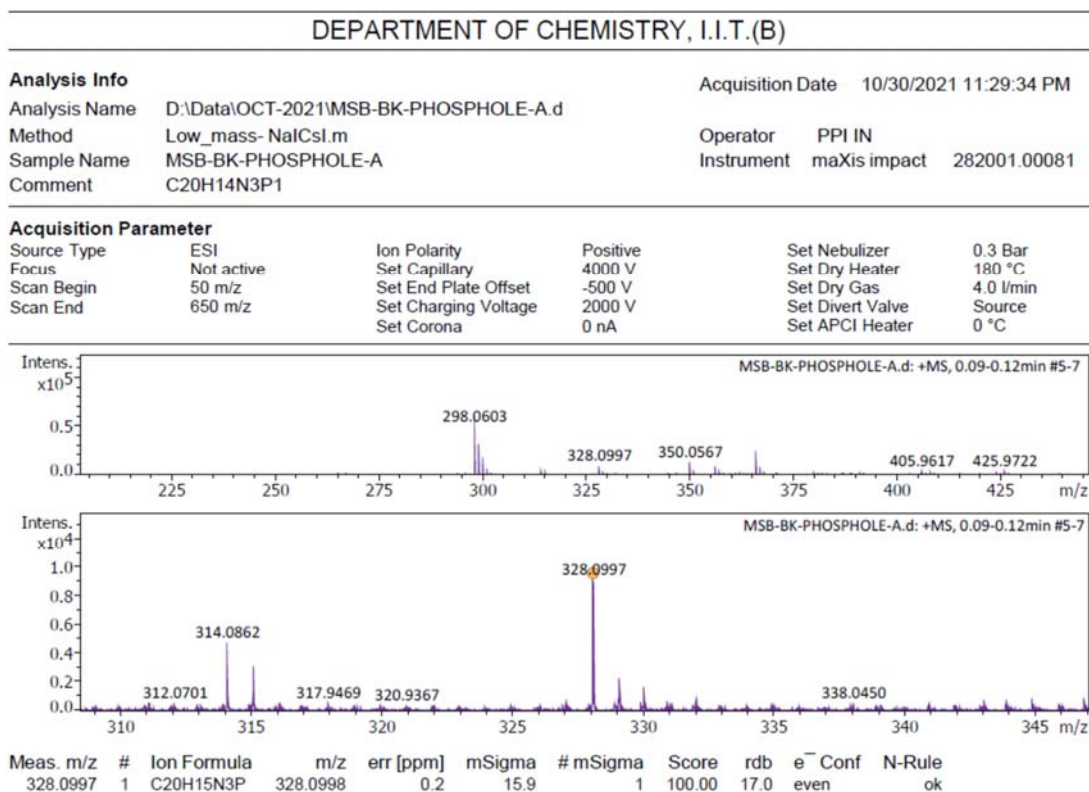

Fig. S6 HRMS spectrum of L1.



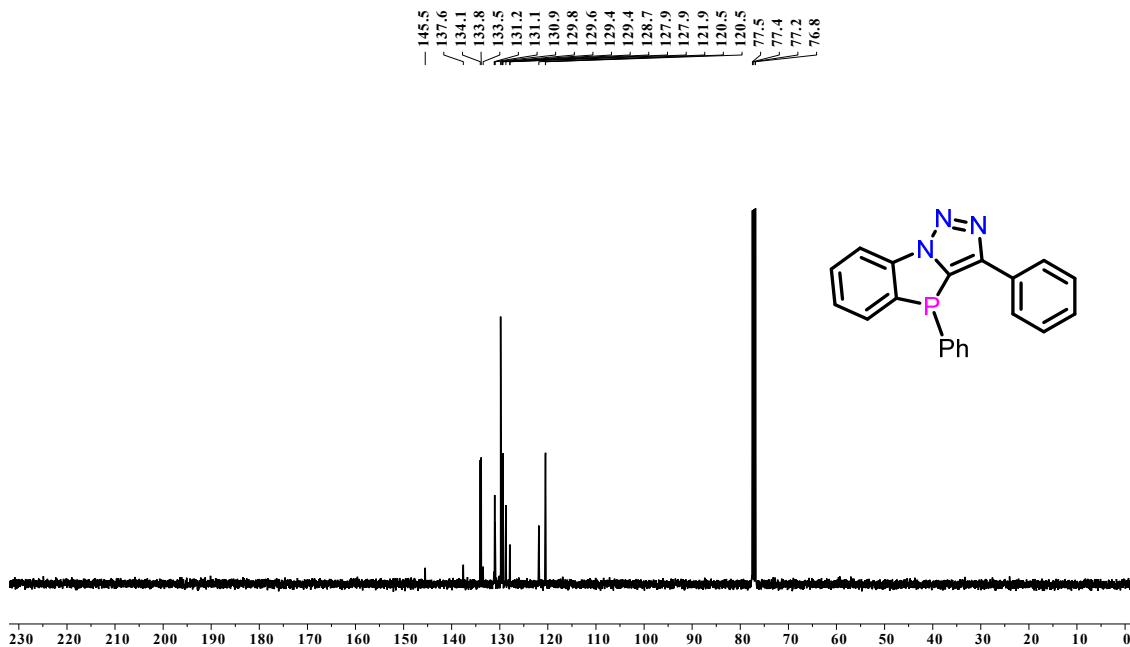

Fig. S9  $^{13}\text{C}\{^1\text{H}\}$  NMR spectrum of L2 in  $\text{CDCl}_3$  (101 MHz).

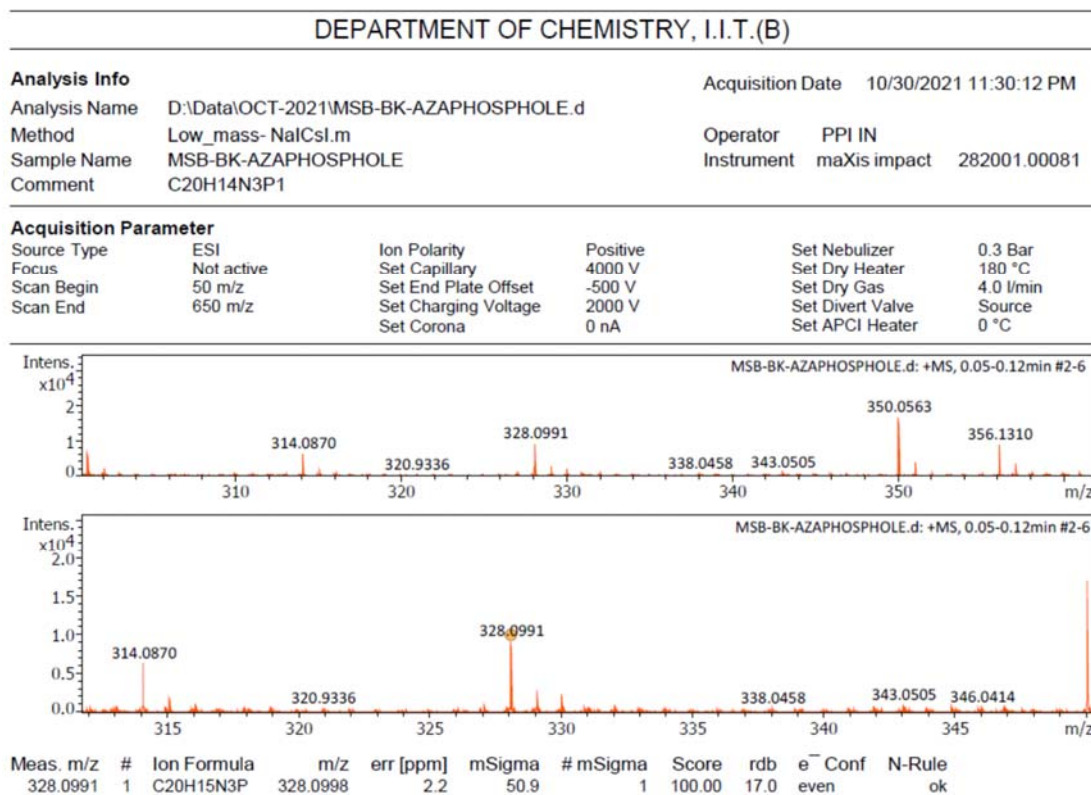

Fig. S10 HRMS spectrum of L2.

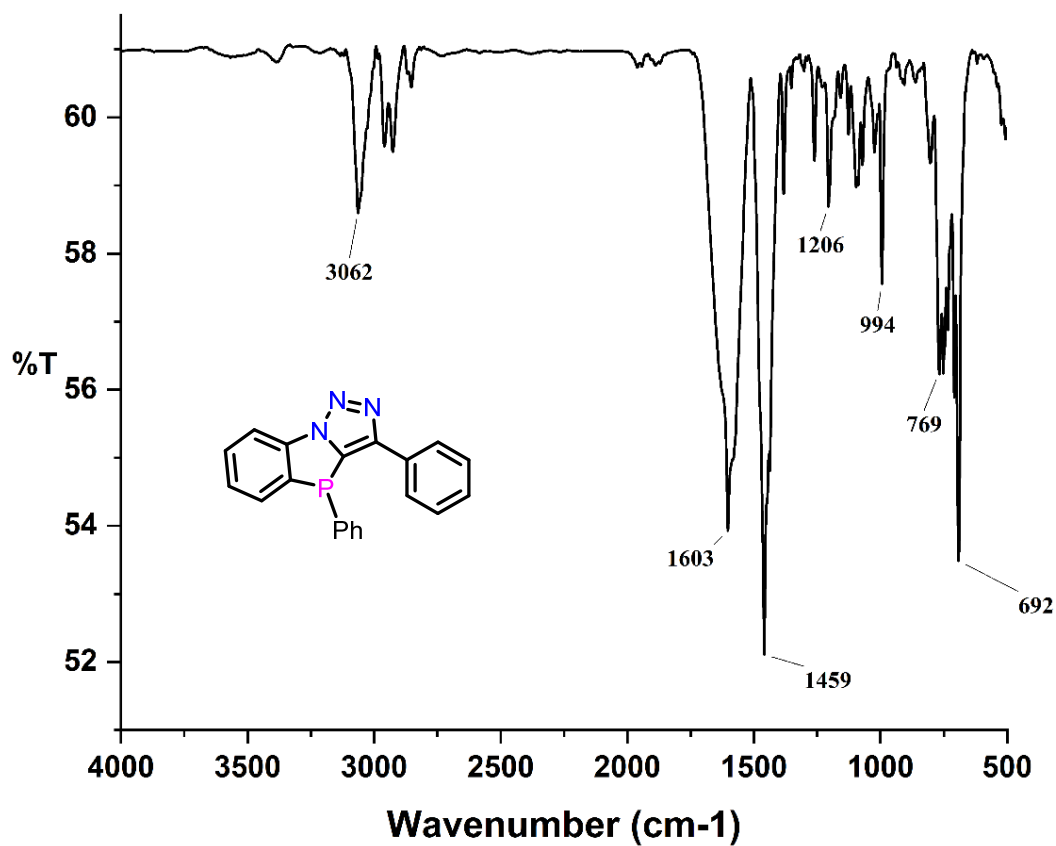

Fig. S11 FT-IR spectrum of compound L2.

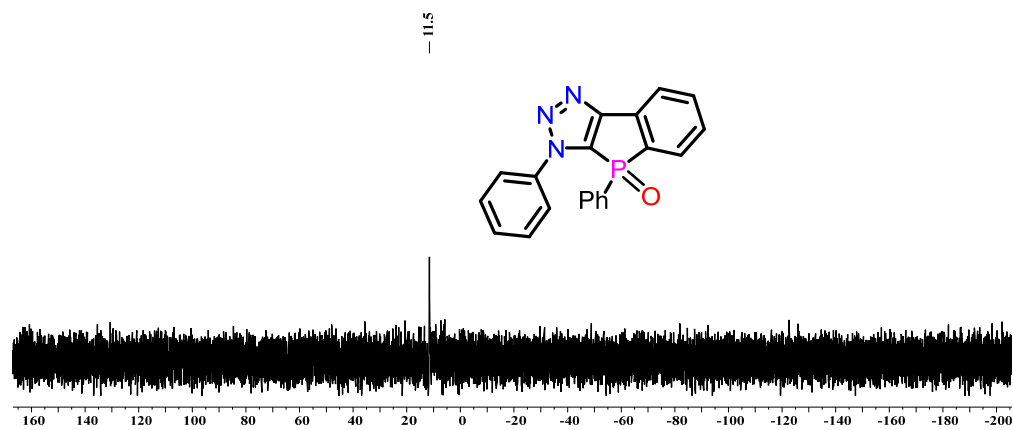

Fig. S12  $^{31}\text{P}\{^1\text{H}\}$  NMR spectrum of L10 in  $\text{CDCl}_3$  (162 MHz).

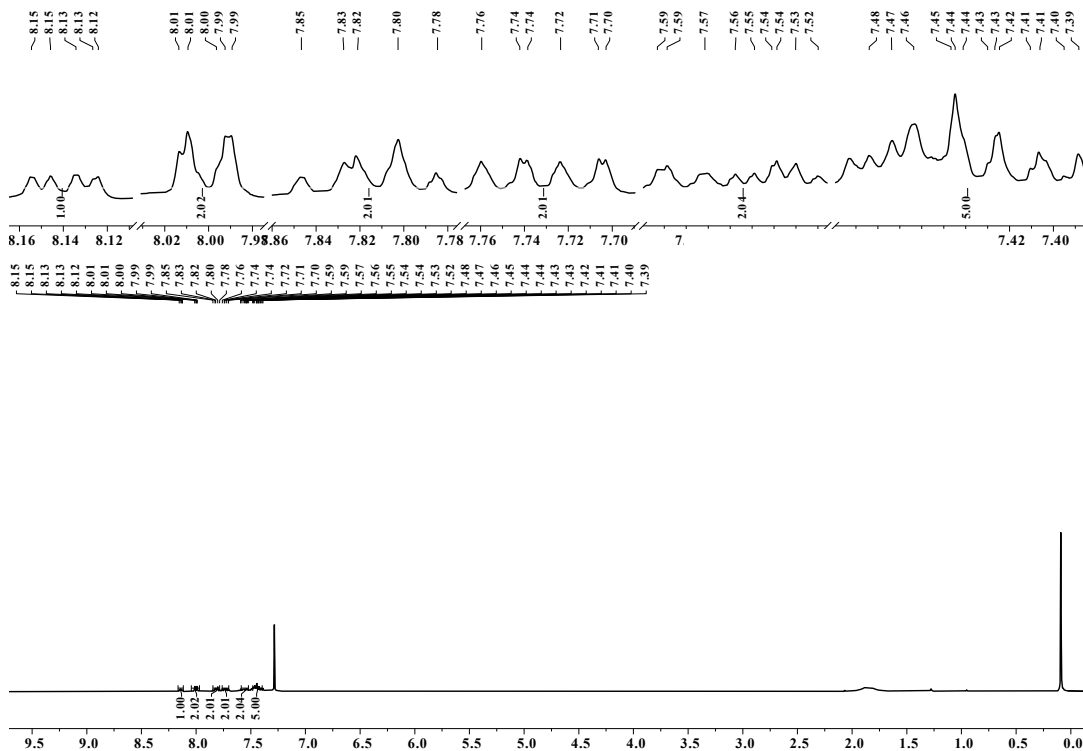

Fig. S13  $^1\text{H}$  NMR spectrum of **L10** in  $\text{CDCl}_3$  (400 MHz).

DEPARTMENT OF CHEMISTRY, I.I.T.(B)

| Analysis Info |                                            | Acquisition Date 11/23/2021 5:21:44 PM |                           |
|---------------|--------------------------------------------|----------------------------------------|---------------------------|
| Analysis Name | D:\Data\NOV-2021\MSB-BK-PHOSPHOLEOXIDE-B.d | Operator                               | SJG-IN                    |
| Method        | Low_mass- NaCsl.m                          | Instrument                             | maXis impact 282001.00081 |
| Sample Name   | MSB-BK-PHOSPHOLEOXIDE-B                    |                                        |                           |
| Comment       | C20H14N3P1O1                               |                                        |                           |

| Acquisition Parameter |            |                      |           |
|-----------------------|------------|----------------------|-----------|
| Source Type           | ESI        | Ion Polarity         | Positive  |
| Focus                 | Not active | Set Capillary        | 4000 V    |
| Scan Begin            | 50 m/z     | Set End Plate Offset | -500 V    |
| Scan End              | 650 m/z    | Set Charging Voltage | 2000 V    |
|                       |            | Set Corona           | 0 nA      |
|                       |            | Set Nebulizer        | 0.3 Bar   |
|                       |            | Set Dry Heater       | 180 °C    |
|                       |            | Set Dry Gas          | 4.0 l/min |
|                       |            | Set Divert Valve     | Source    |
|                       |            | Set APCI Heater      | 0 °C      |

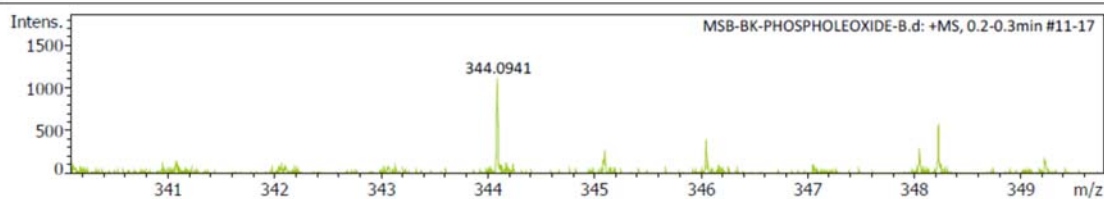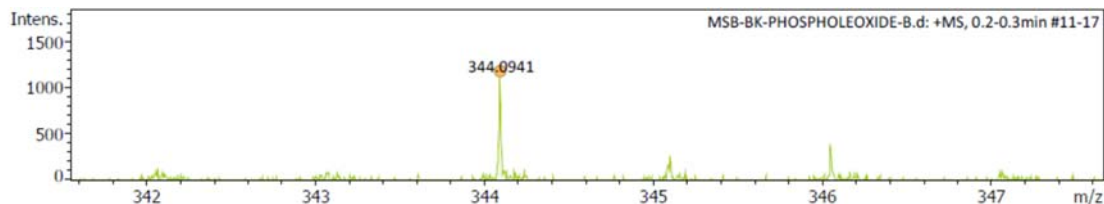

| Meas. m/z | # | Ion Formula | m/z      | err [ppm] | mSigma | # mSigma | Score  | rdb  | e <sup>-</sup> Conf | N-Rule |
|-----------|---|-------------|----------|-----------|--------|----------|--------|------|---------------------|--------|
| 344.0941  | 1 | C20H15N3OP  | 344.0947 | 1.9       | n.a.   | 1        | 100.00 | 17.0 | even                | ok     |

Fig. S14 HRMS spectrum of **L10**.

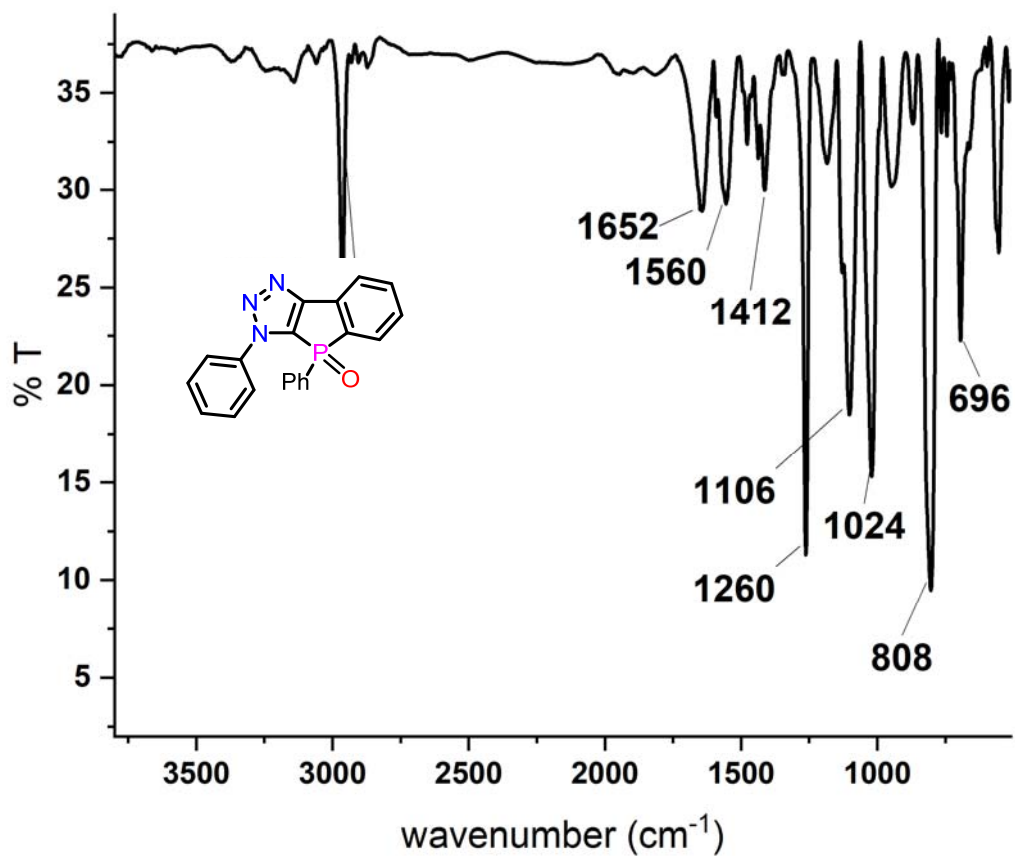

Fig. S15 FT-IR spectrum of compound L1o.

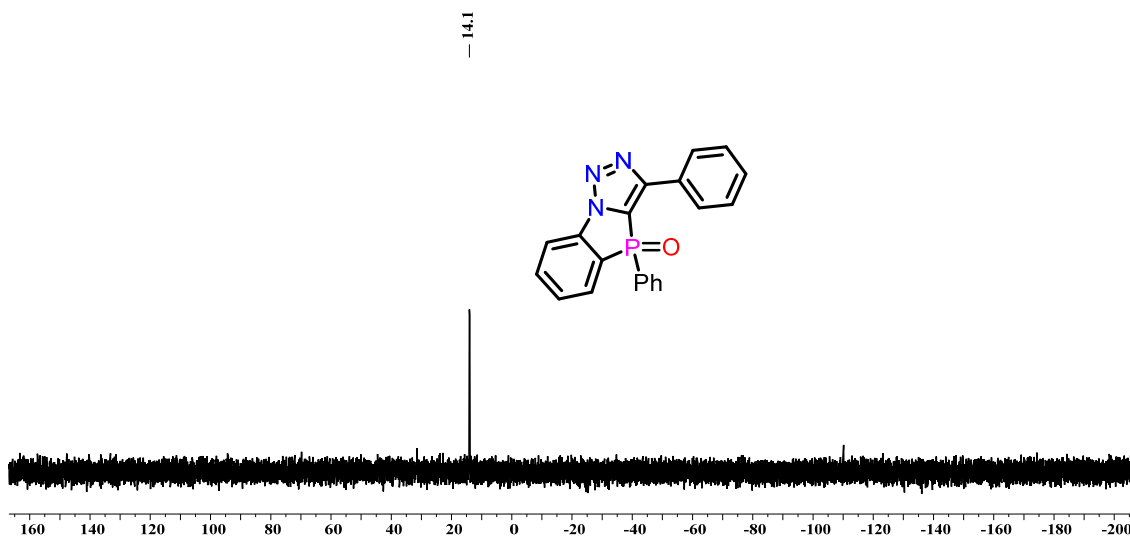

Fig. S16 <sup>31</sup>P{<sup>1</sup>H} NMR spectrum of L2o in CDCl<sub>3</sub> (162 MHz).



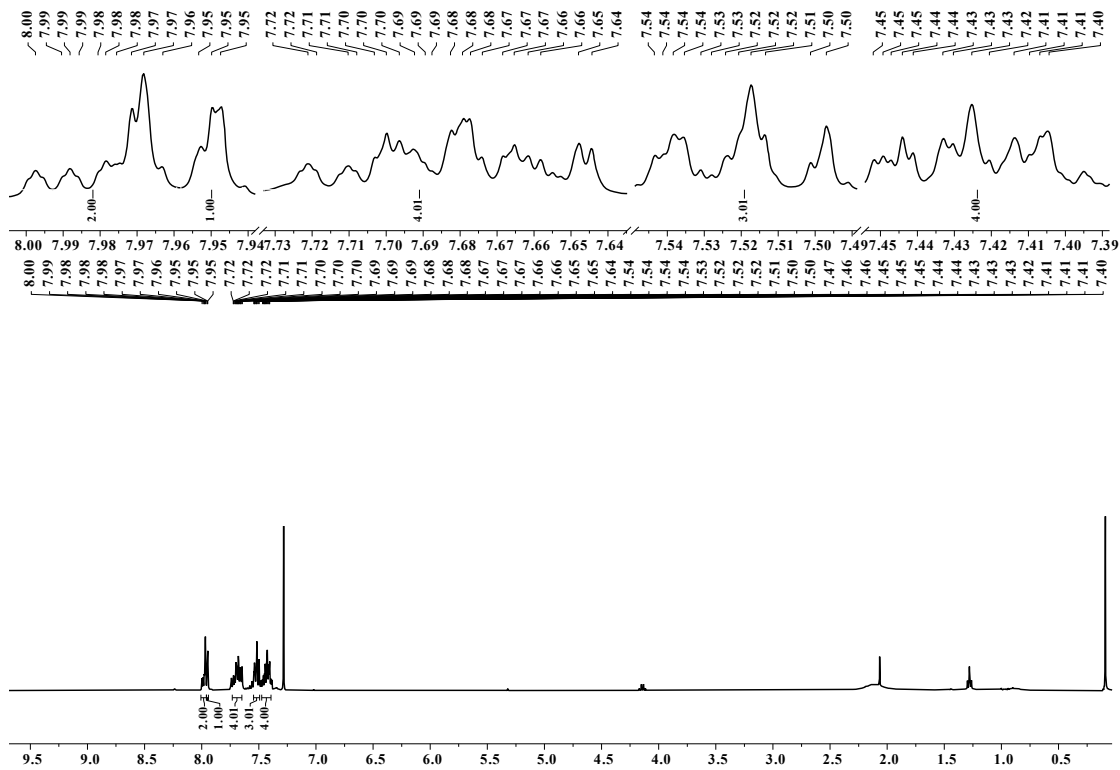

Fig. S17 <sup>1</sup>H NMR spectrum of L2o in CDCl<sub>3</sub> (400 MHz).

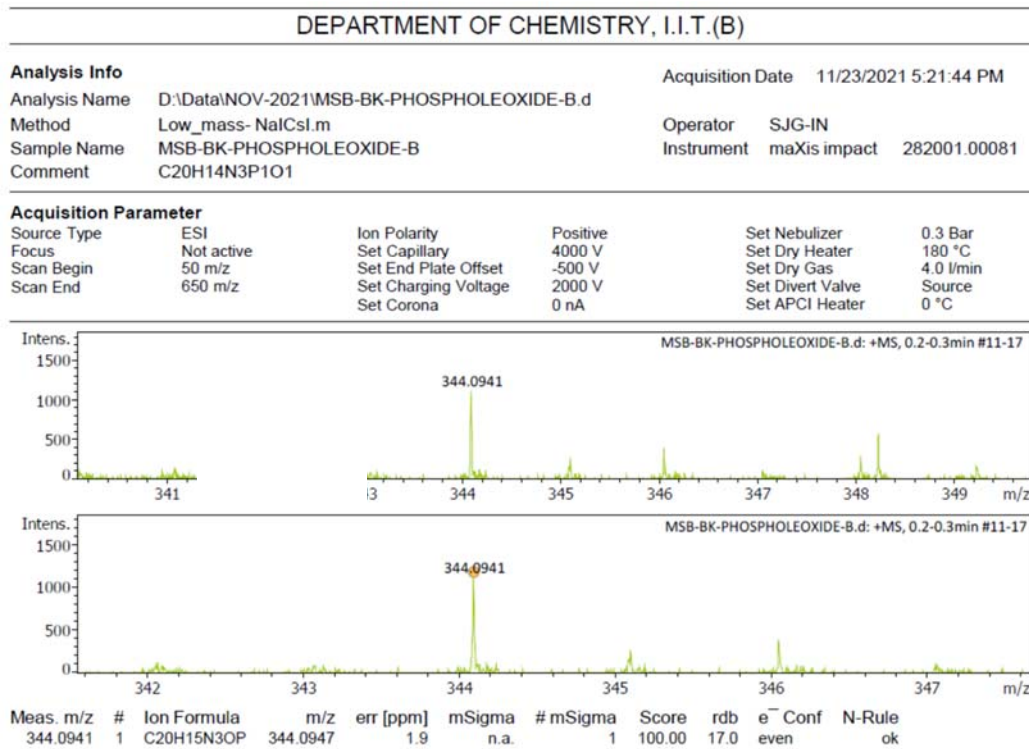

Fig. S18 HRMS spectrum of L2o.

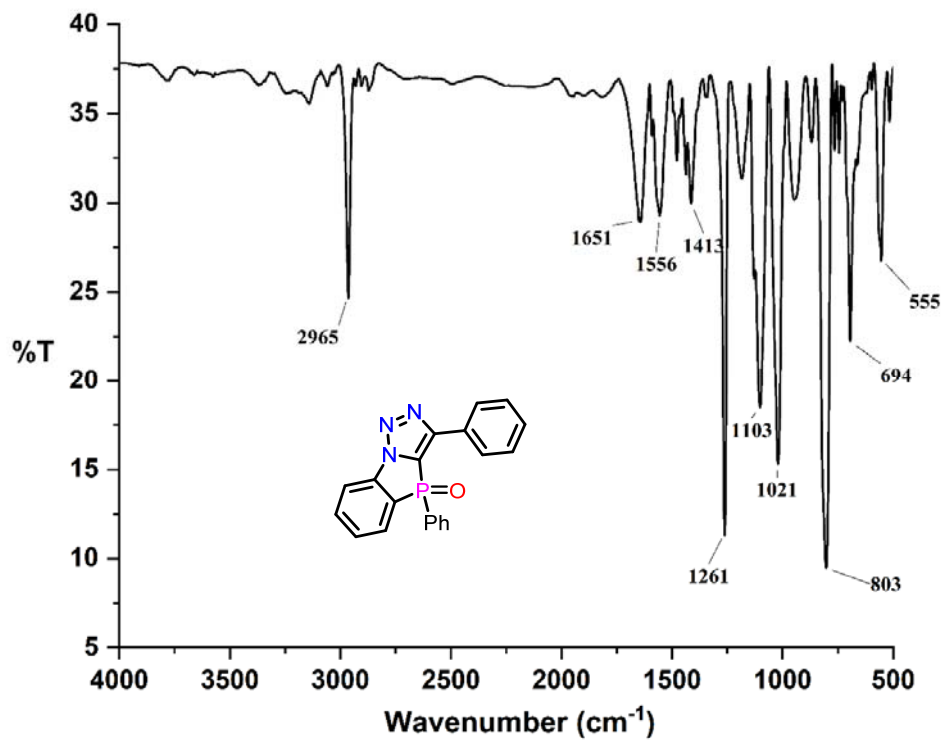

Fig. S19 FT-IR spectrum of compound L20.

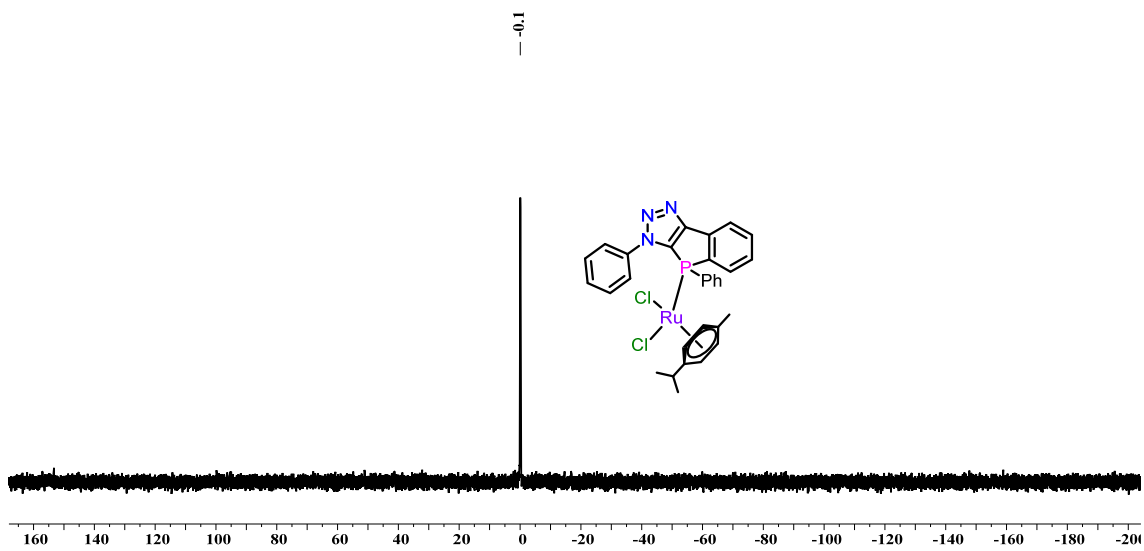

Fig. S20 <sup>31</sup>P{<sup>1</sup>H} NMR spectrum of **1** in CDCl<sub>3</sub> (162 MHz).

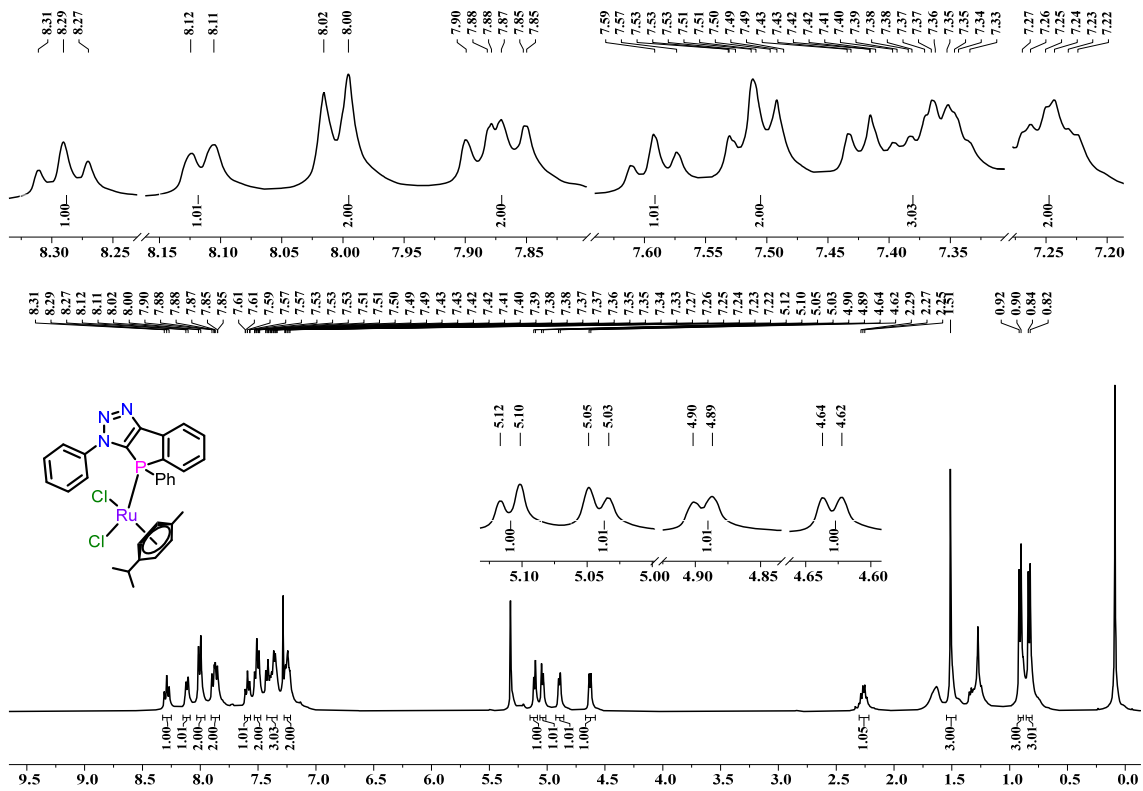

DEPARTMENT OF CHEMISTRY, I.I.T.(B)

**Analysis Info**  
 Analysis Name D:\Data\OCT-2021\MSB-BK-AZAPHOSPHOLE-Ru-A.d Acquisition Date 10/30/2021 11:47:37 PM  
 Method Naformat\_pos\_1000B.m Operator PPI IN  
 Sample Name MSB-BK-AZAPHOSPHOLE-Ru-A Instrument maXis impact 282001.00081  
 Comment C30H27N3P1Ru1Cl1

**Acquisition Parameter**

|             |            |                      |          |                  |           |
|-------------|------------|----------------------|----------|------------------|-----------|
| Source Type | ESI        | Ion Polarity         | Positive | Set Nebulizer    | 0.3 Bar   |
| Focus       | Not active | Set Capillary        | 3700 V   | Set Dry Heater   | 180 °C    |
| Scan Begin  | 50 m/z     | Set End Plate Offset | -500 V   | Set Dry Gas      | 4.0 l/min |
| Scan End    | 1000 m/z   | Set Charging Voltage | 2000 V   | Set Divert Valve | Source    |
|             |            | Set Corona           | 0 nA     | Set APCI Heater  | 0 °C      |

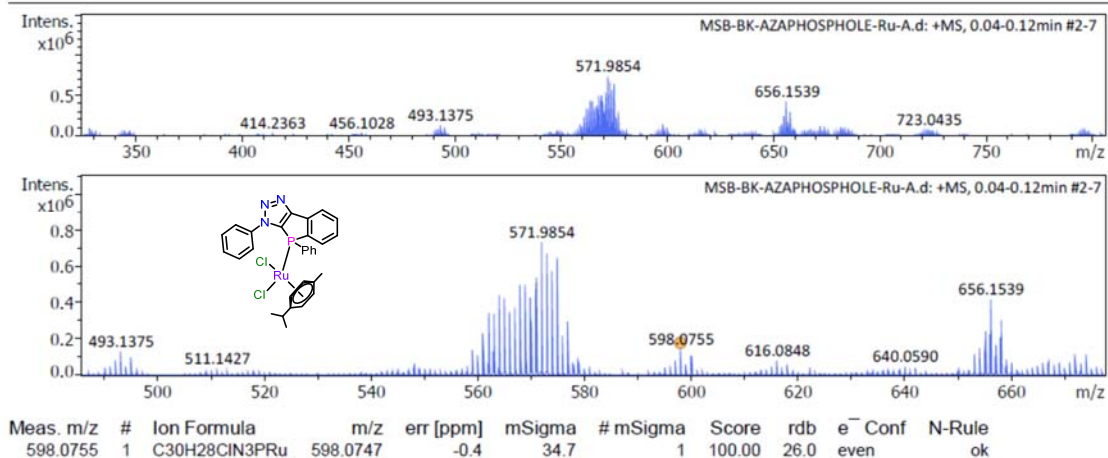

Fig. S23 HRMS spectrum of 1.

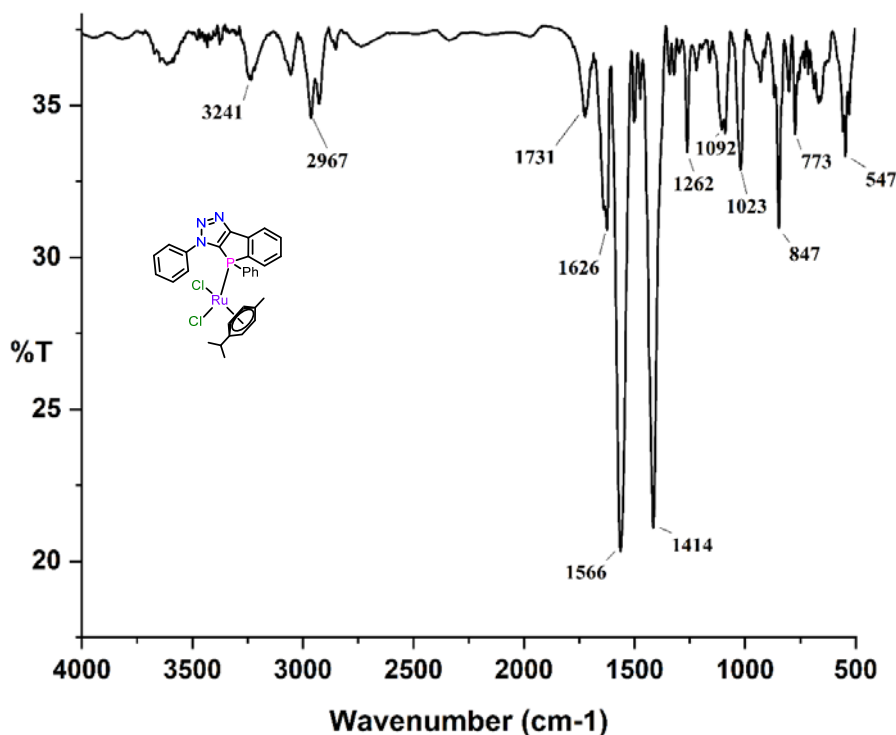

Fig. S24 FT-IR spectrum of compound 1.



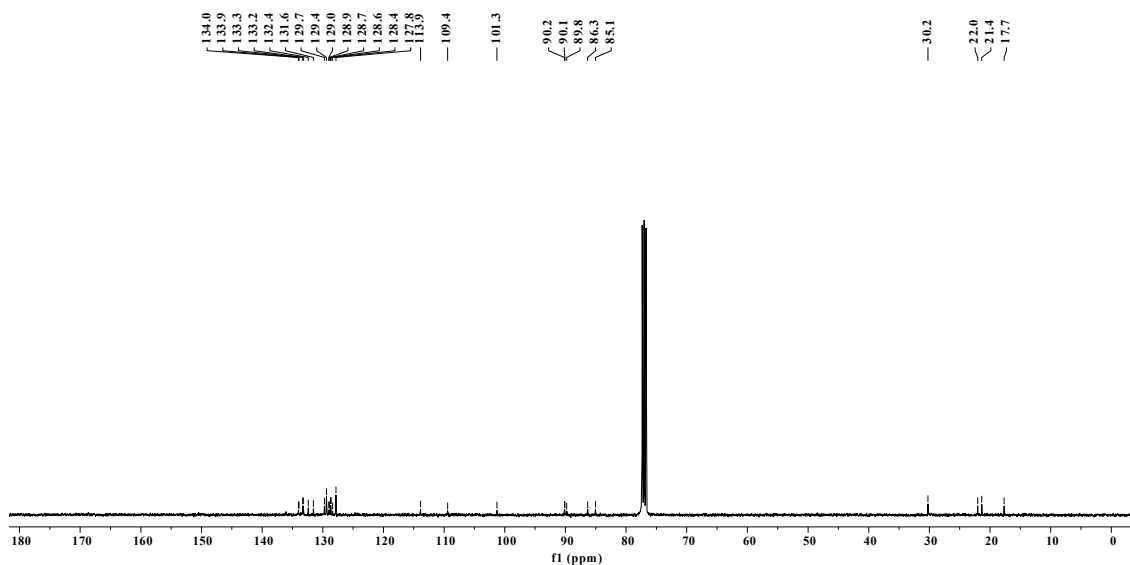

Fig. S27  $^{13}\text{C}\{^1\text{H}\}$  NMR spectrum of **2** in  $\text{CDCl}_3$  (101 MHz).

DEPARTMENT OF CHEMISTRY, I.I.T.(B)

Analysis Info

Analysis Name D:\Data\OCT-2021\MSB-BK-AZAPHOSPHOLE-Ru-A.d  
 Method Naformat\_pos\_1000B.m  
 Sample Name MSB-BK-AZAPHOSPHOLE-Ru-A  
 Comment C30H27N3P1Ru1C11

Acquisition Date 10/30/2021 11:47:37 PM

Operator PPI IN  
 Instrument maXis impact 282001.00081

Acquisition Parameter

|             |            |                      |          |                  |           |
|-------------|------------|----------------------|----------|------------------|-----------|
| Source Type | ESI        | Ion Polarity         | Positive | Set Nebulizer    | 0.3 Bar   |
| Focus       | Not active | Set Capillary        | 3700 V   | Set Dry Heater   | 180 °C    |
| Scan Begin  | 50 m/z     | Set End Plate Offset | -500 V   | Set Dry Gas      | 4.0 l/min |
| Scan End    | 1000 m/z   | Set Charging Voltage | 2000 V   | Set Divert Valve | Source    |
|             |            | Set Corona           | 0 nA     | Set APCI Heater  | 0 °C      |

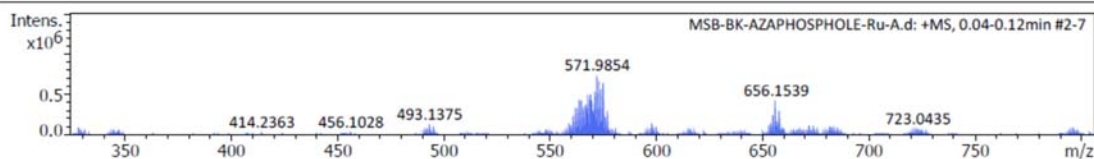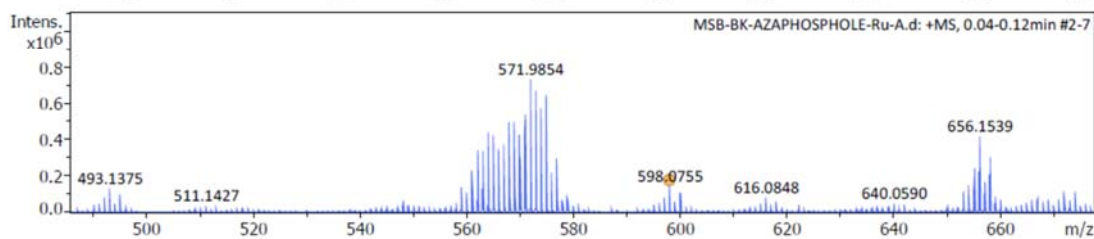

| Meas. m/z | # | Ion Formula   | m/z      | err [ppm] | mSigma | # mSigma | Score  | rdb  | e <sup>-</sup> Conf | N-Rule |
|-----------|---|---------------|----------|-----------|--------|----------|--------|------|---------------------|--------|
| 598.0755  | 1 | C30H28ClN3PRu | 598.0747 | -0.4      | 34.7   | 1        | 100.00 | 26.0 | even                | ok     |

Fig. S28 HRMS spectrum of **2**.

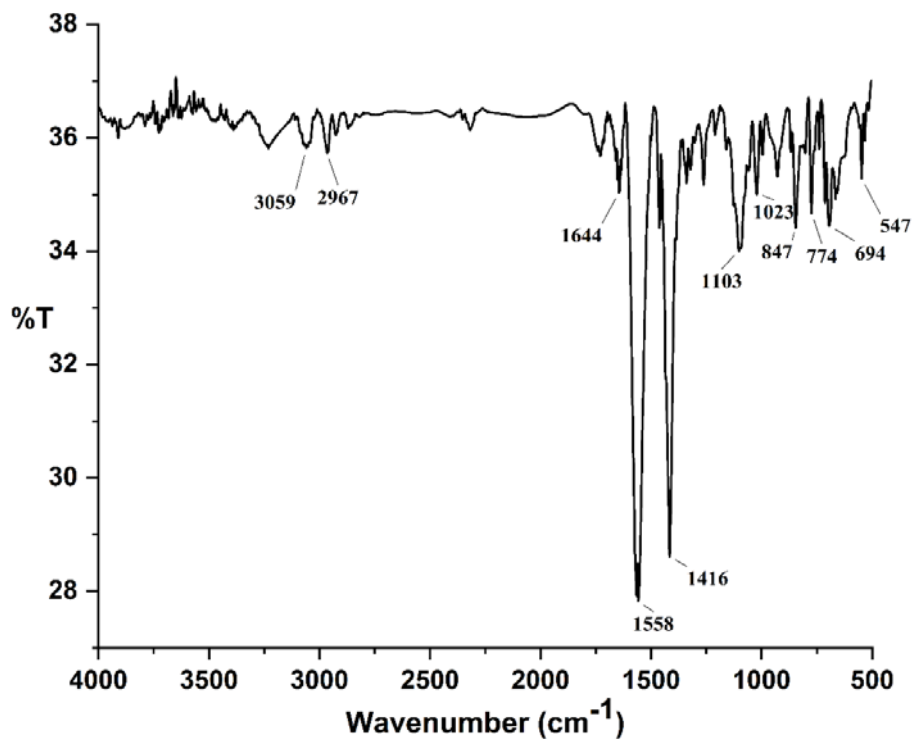

Fig. S29 FT-IR spectrum of compound 2.

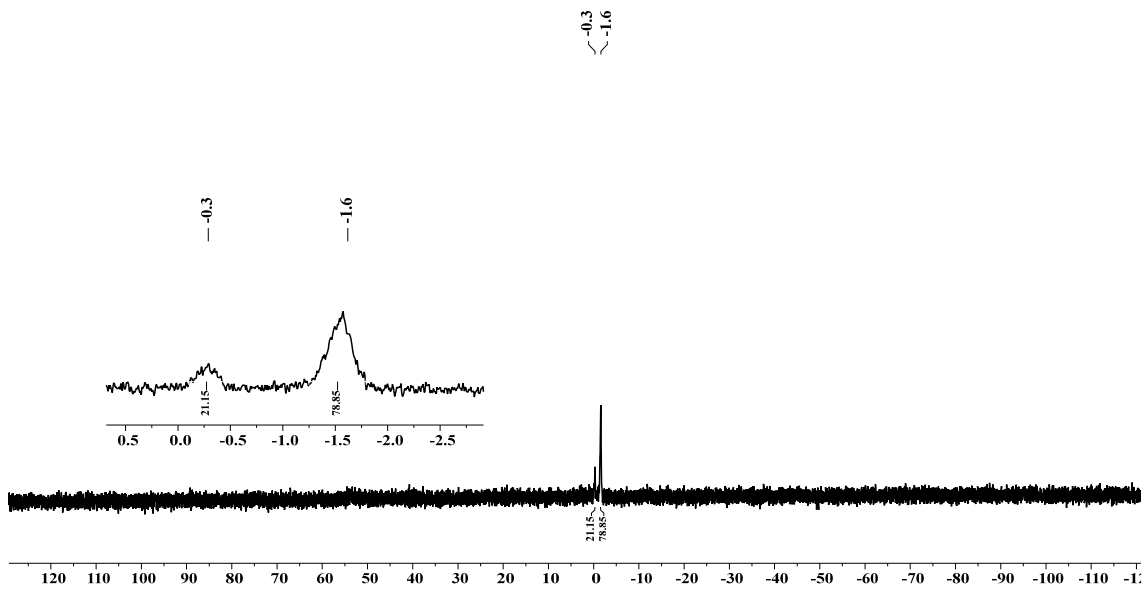

Fig. S30 <sup>31</sup>P{<sup>1</sup>H} NMR spectrum of 3 in CDCl<sub>3</sub> (162 MHz).

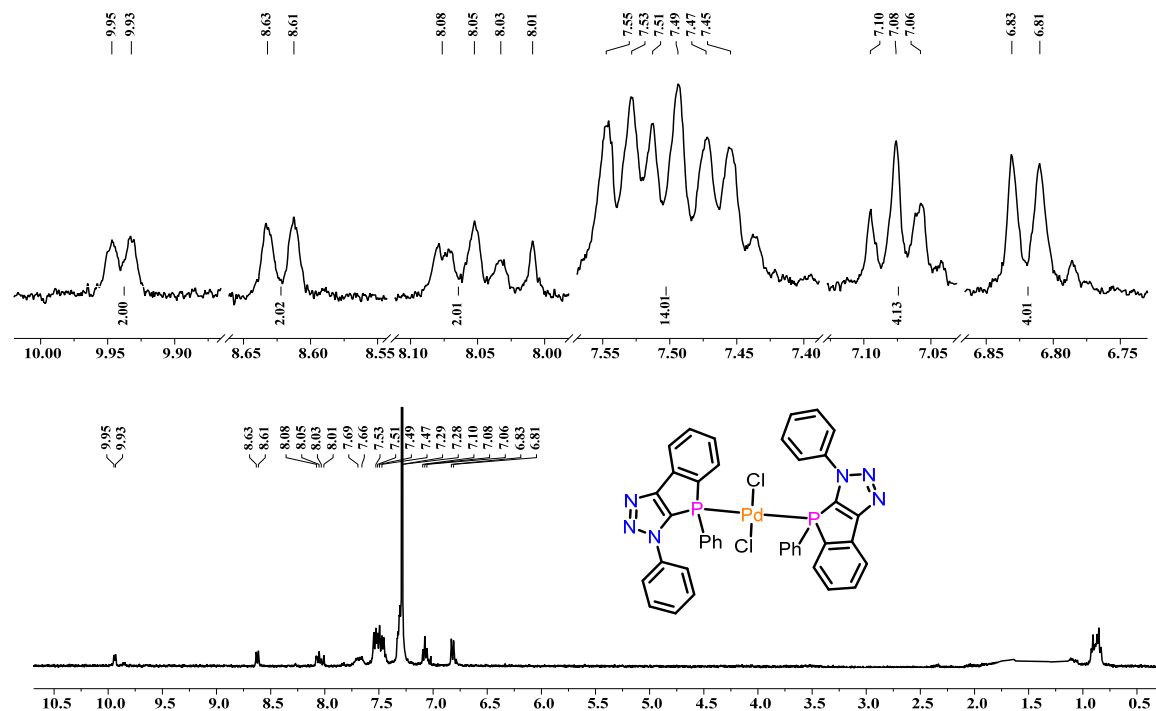

Fig. S31 <sup>1</sup>H NMR spectrum of **3** in CDCl<sub>3</sub> (400 MHz).

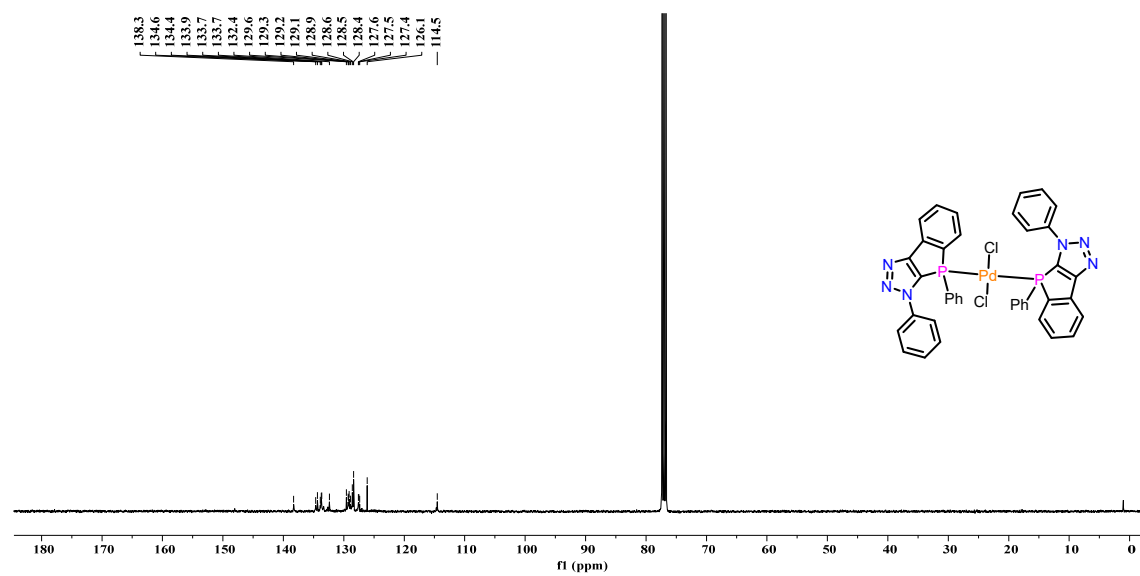

Fig. S32 <sup>13</sup>C{<sup>1</sup>H} NMR spectrum of **3** in CDCl<sub>3</sub> (101 MHz).



DEPARTMENT OF CHEMISTRY, I.I.T.(B)

**Analysis Info**  
 Analysis Name D:\Data\NOV-2021\MSB-BK-AZAPHOS-PdCOD-B.d  
 Method NaICSI\_pos\_1500.m  
 Sample Name MSB-BK-AZAPHOS-PdCOD-B  
 Comment C40H48Cl2N6P2Pd1  
 Acquisition Date 11/26/2021 8:25:19 PM  
 Operator PG SRD OUT  
 Instrument maXis impact 282001.00081

**Acquisition Parameter**

|             |            |                      |          |                  |           |
|-------------|------------|----------------------|----------|------------------|-----------|
| Source Type | ESI        | Ion Polarity         | Positive | Set Nebulizer    | 0.3 Bar   |
| Focus       | Not active | Set Capillary        | 3700 V   | Set Dry Heater   | 180 °C    |
| Scan Begin  | 50 m/z     | Set End Plate Offset | -500 V   | Set Dry Gas      | 4.0 l/min |
| Scan End    | 1500 m/z   | Set Charging Voltage | 2000 V   | Set Divert Valve | Source    |
|             |            | Set Corona           | 0 nA     | Set APCI Heater  | 0 °C      |

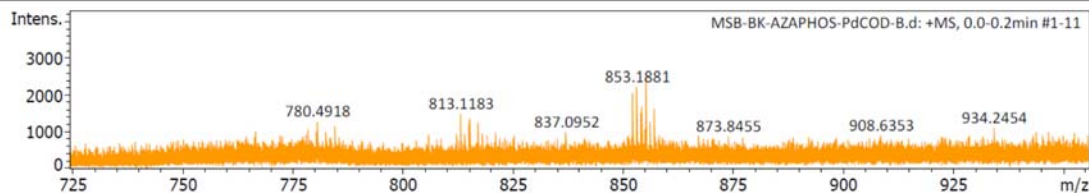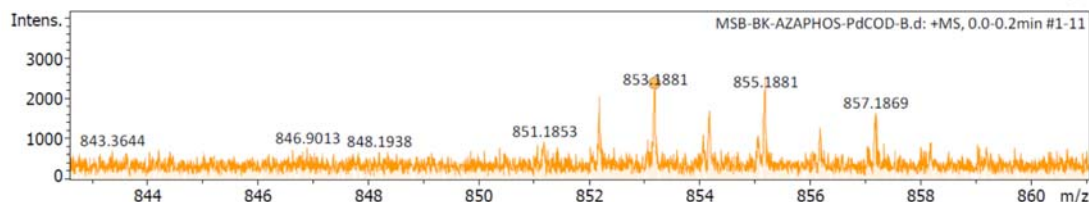

| Meas. m/z | # | Ion Formula     | m/z      | err [ppm] | mSigma | # mSigma | Score  | rdb  | e <sup>-</sup> Conf | N-Rule |
|-----------|---|-----------------|----------|-----------|--------|----------|--------|------|---------------------|--------|
| 853.1881  | 1 | C40H49Cl2N6P2Pd | 851.1900 | 2.1       | 322.3  | 1        | 100.00 | 29.0 | even                | ok     |

Fig. S33 HRMS spectrum of 3.

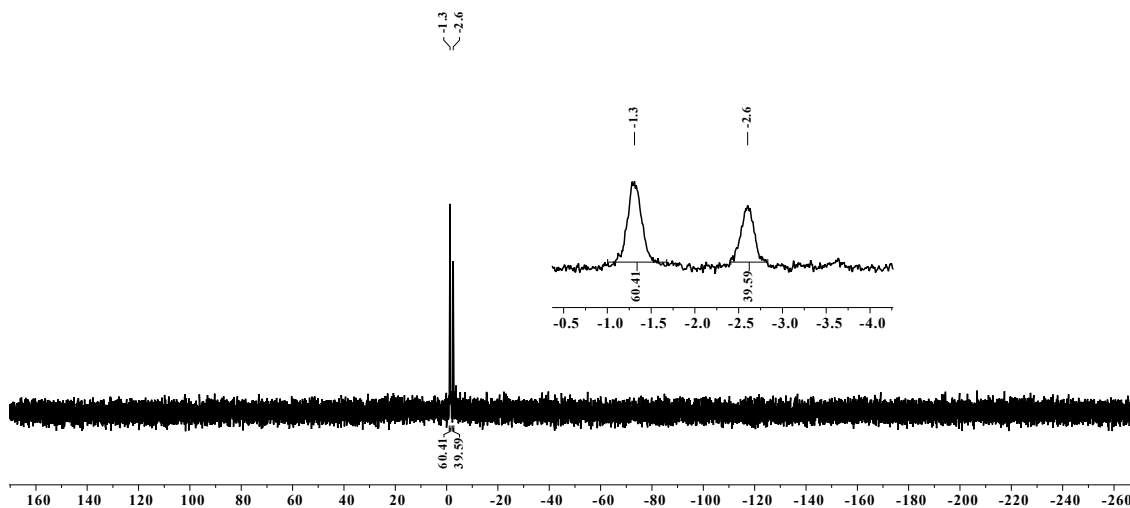

Fig. S34 <sup>31</sup>P{<sup>1</sup>H} NMR spectrum of 4 in CDCl<sub>3</sub> (162 MHz).

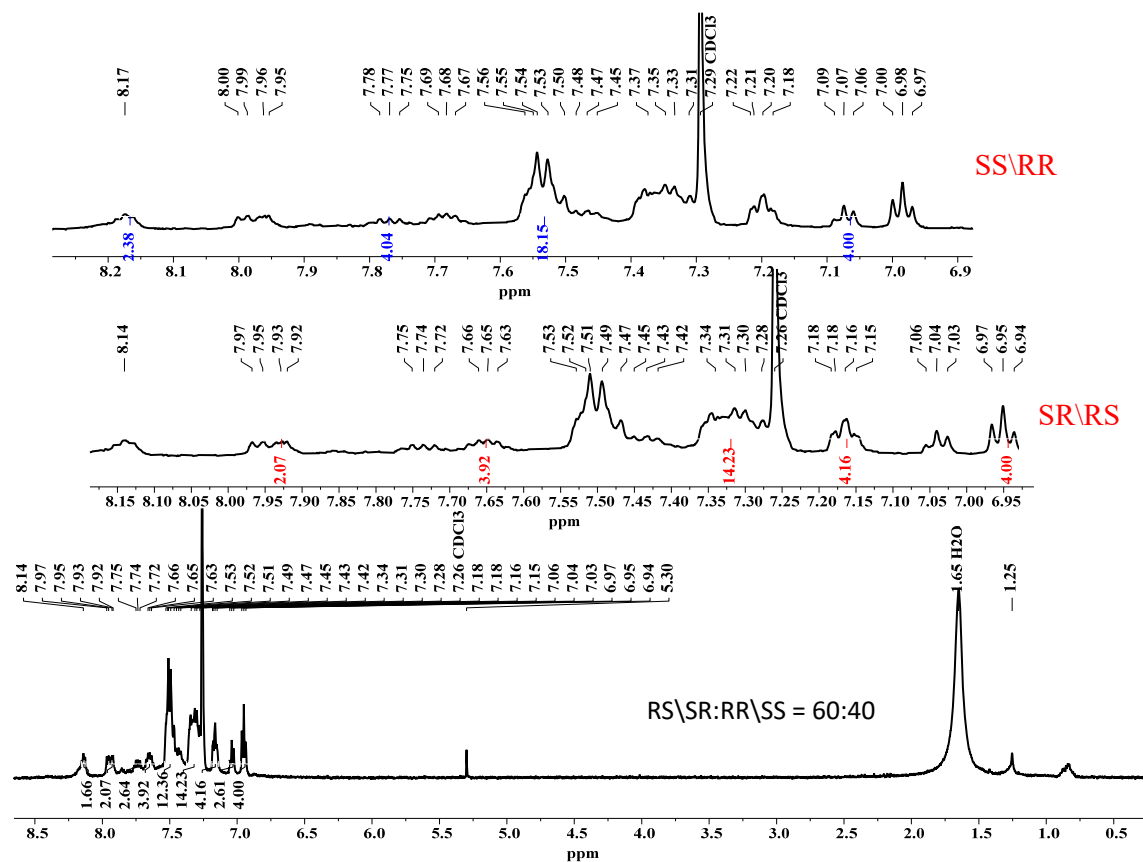

Fig. S35  $^1\text{H}$  NMR spectrum of **4** in  $\text{CDCl}_3$  (400 MHz).

DEPARTMENT OF CHEMISTRY, I.I.T.(B)

**Analysis Info**  
 Analysis Name D:\Data\NOV-2021\MSB-BK-AZAPHOS-PdCOD-B.d  
 Method NaICsl\_pos\_1500.m  
 Sample Name MSB-BK-AZAPHOS-PdCOD-B  
 Comment C40H48Cl2N6P2Pd1  
 Acquisition Date 11/26/2021 8:25:19 PM  
 Operator PG SRD OUT  
 Instrument maXis impact 282001.00081

**Acquisition Parameter**

|             |            |                      |          |                  |           |
|-------------|------------|----------------------|----------|------------------|-----------|
| Source Type | ESI        | Ion Polarity         | Positive | Set Nebulizer    | 0.3 Bar   |
| Focus       | Not active | Set Capillary        | 3700 V   | Set Dry Heater   | 180 °C    |
| Scan Begin  | 50 m/z     | Set End Plate Offset | -500 V   | Set Dry Gas      | 4.0 l/min |
| Scan End    | 1500 m/z   | Set Charging Voltage | 2000 V   | Set Divert Valve | Source    |
|             |            | Set Corona           | 0 nA     | Set APCI Heater  | 0 °C      |

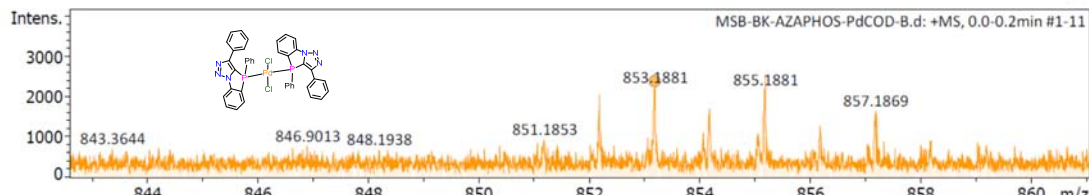

| Meas. m/z | # | Ion Formula     | m/z      | err [ppm] | mSigma | # mSigma | Score  | rdb  | e <sup>-</sup> Conf | N-Rule |
|-----------|---|-----------------|----------|-----------|--------|----------|--------|------|---------------------|--------|
| 853.1881  | 1 | C40H49Cl2N6P2Pd | 851.1900 | 2.1       | 322.3  | 1        | 100.00 | 29.0 | even                | ok     |

Fig. S36 HRMS spectrum of 4.

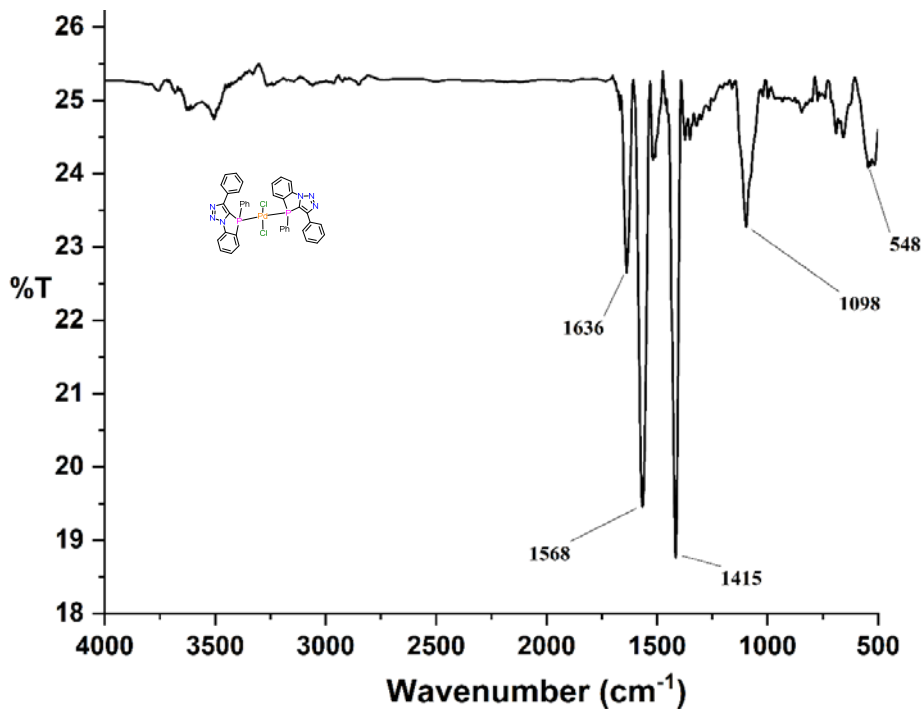

Fig. S37 FT-IR spectrum of compound 4.

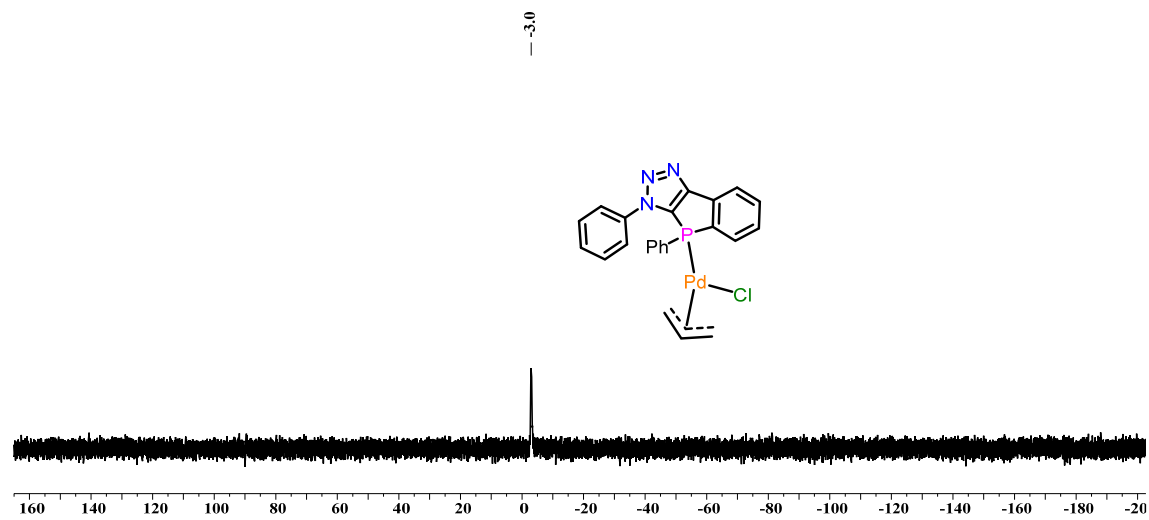

**Fig. S38**  $^{31}\text{P}\{^1\text{H}\}$  NMR spectrum of **5** in  $\text{CDCl}_3$  (162 MHz).

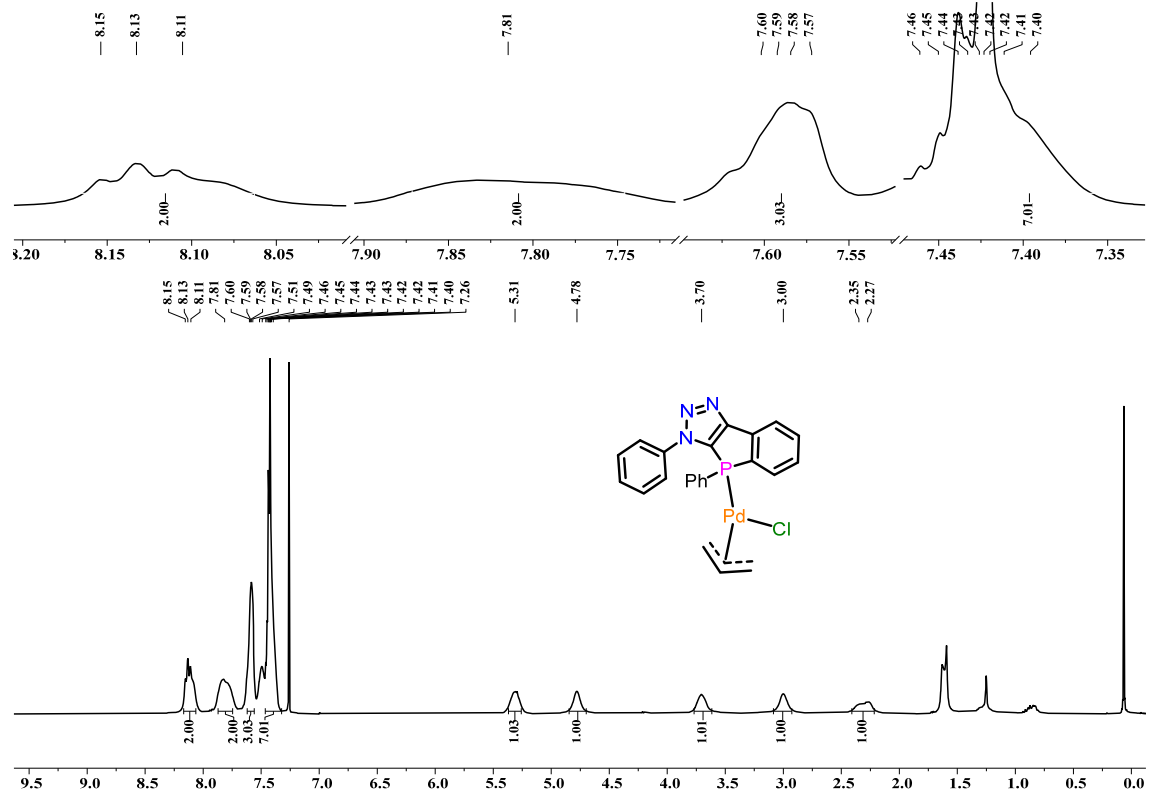

**Fig. S39**  $^1\text{H}$  NMR spectrum of **5** in  $\text{CDCl}_3$  (400 MHz).

DEPARTMENT OF CHEMISTRY, I.I.T.(B)

**Analysis Info**  
 Analysis Name D:\Data\OCT-2021\MSB-BK-PHOSPHOLE-Pd-Allyl-A.d Acquisition Date 10/31/2021 12:01:30 AM  
 Method Naformat\_pos\_1000a.m Operator PPI IN  
 Sample Name MSB-BK-PHOSPHOLE-Pd-Allyl-A Instrument maXis impact 282001.00081  
 Comment C23H19N3P1Cl1Pd1

**Acquisition Parameter**  
 Source Type ESI Ion Polarity Positive Set Nebulizer 0.3 Bar  
 Focus Not active Set Capillary 3700 V Set Dry Heater 180 °C  
 Scan Begin 50 m/z Set End Plate Offset -500 V Set Dry Gas 4.0 l/min  
 Scan End 1000 m/z Set Charging Voltage 2000 V Set Divert Valve Source  
 Set Corona 0 nA Set APCI Heater 0 °C

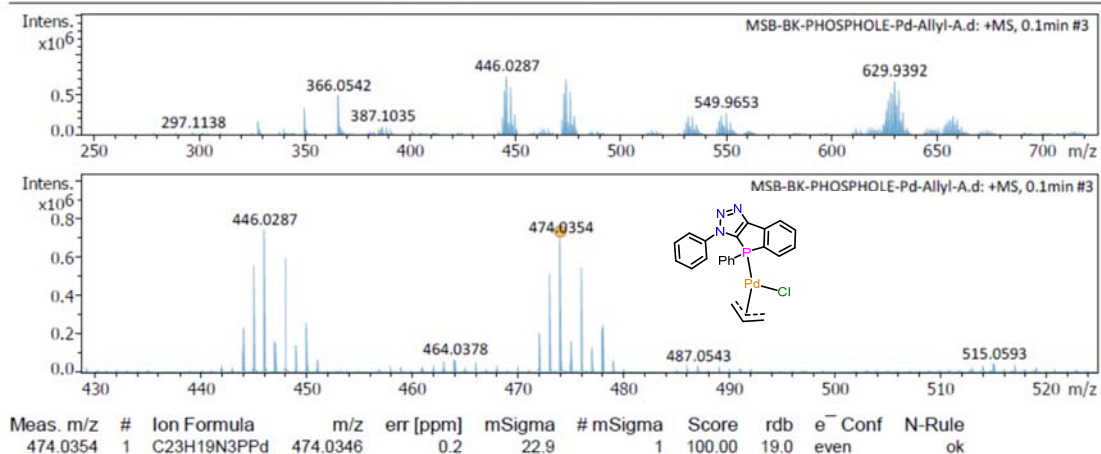

Fig. S40 HRMS spectrum of 5.

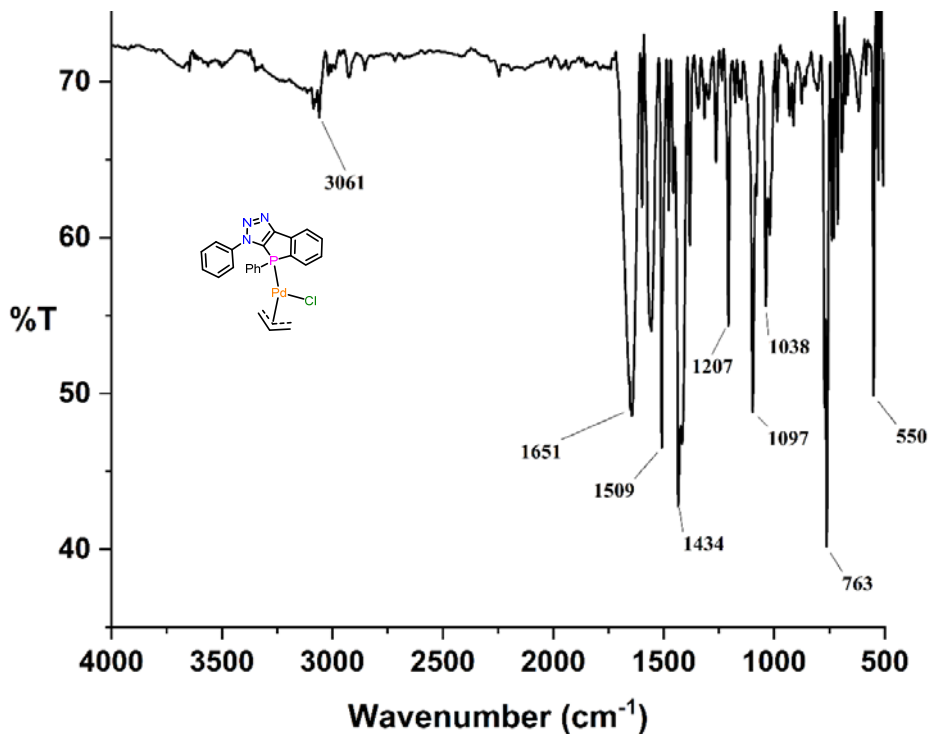

Fig. S41 FT-IR spectrum of compound 5.

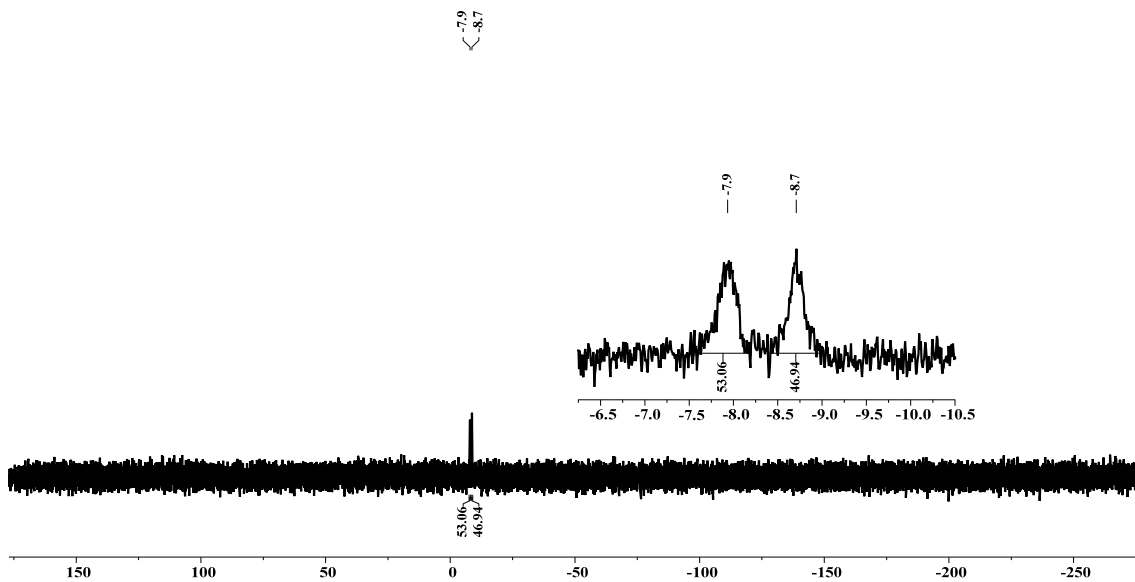

Fig. S42  $^{31}\text{P}\{^1\text{H}\}$  NMR spectrum of **6** in  $\text{CDCl}_3$  (162 MHz).

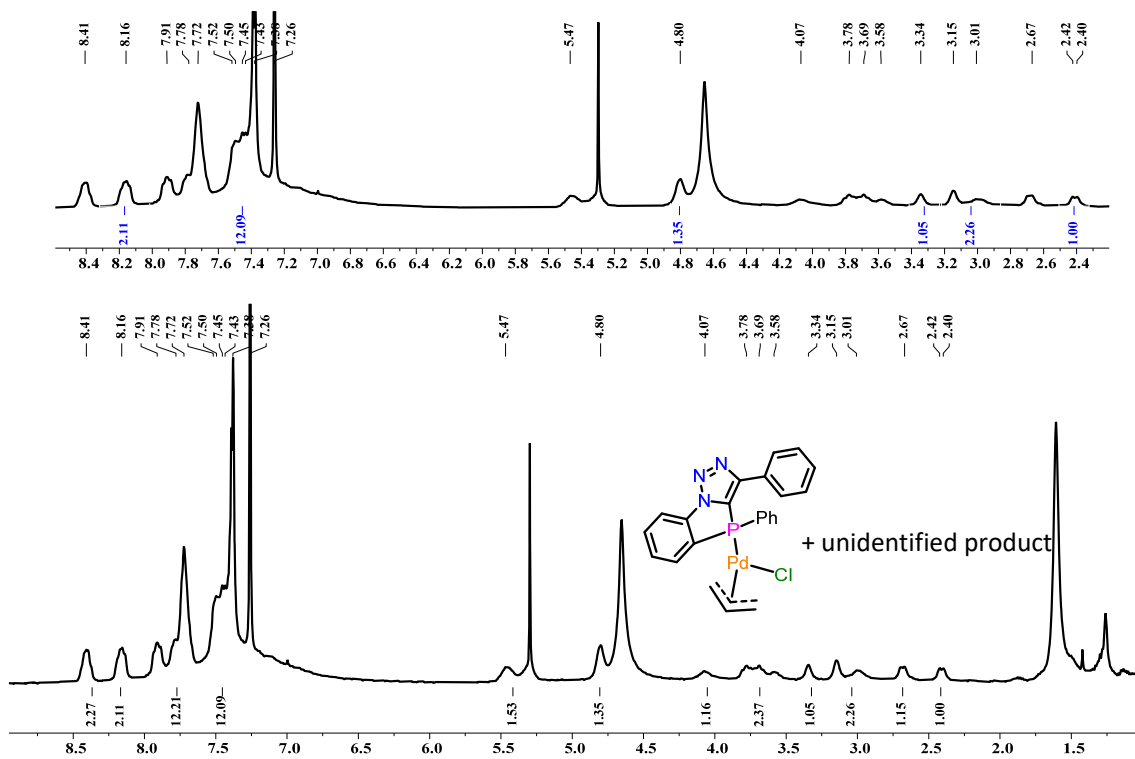

Fig. S43  $^1\text{H}$  NMR spectrum of **6** in  $\text{CDCl}_3$  (400 MHz).

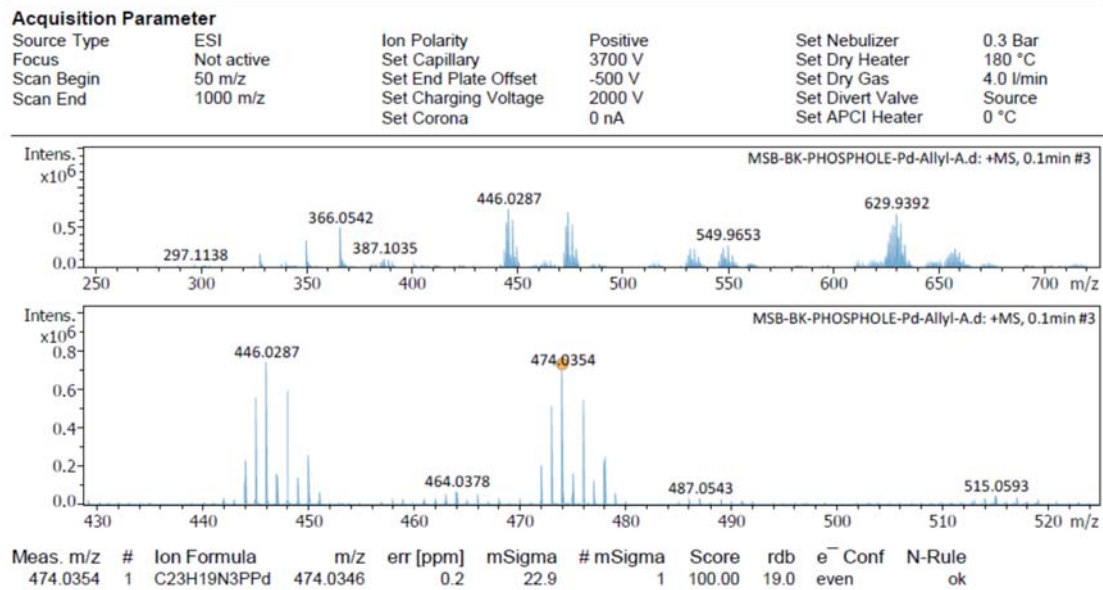

Fig. S44 HRMS spectrum of 6.

89

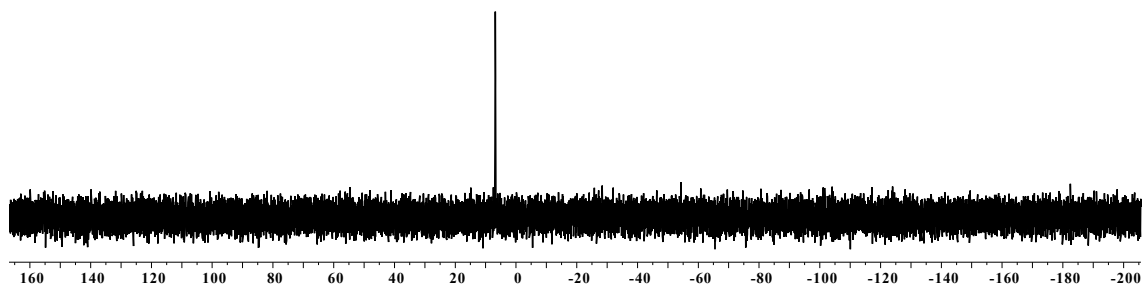

Fig. S45 <sup>31</sup>P{<sup>1</sup>H} NMR spectrum of 7 in CDCl<sub>3</sub> (162 MHz).

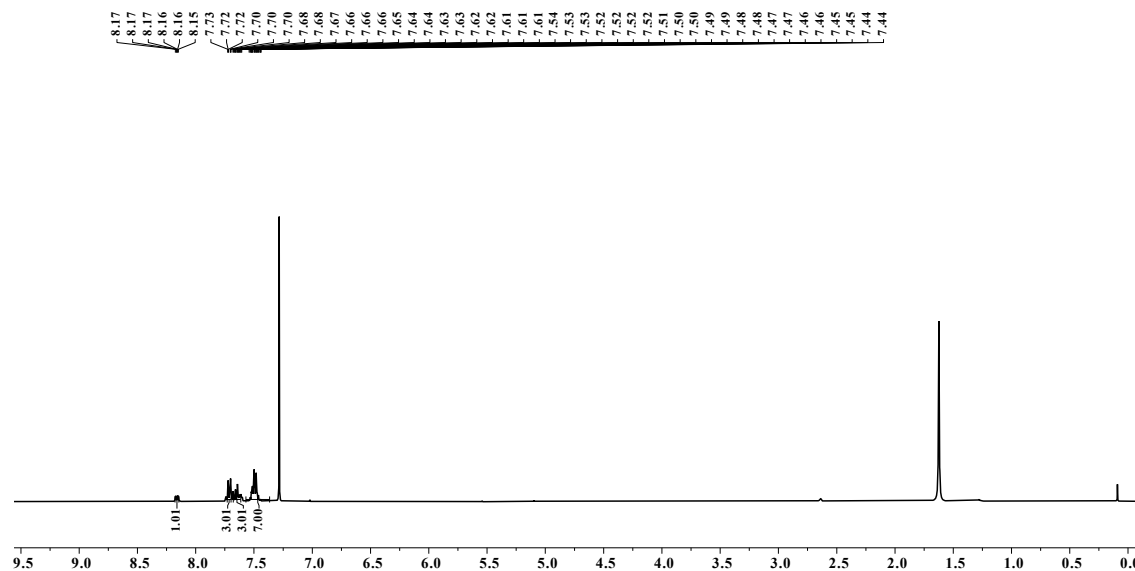

Fig. S46  $^1\text{H}$  NMR spectrum of **7** in  $\text{CDCl}_3$  (400 MHz).

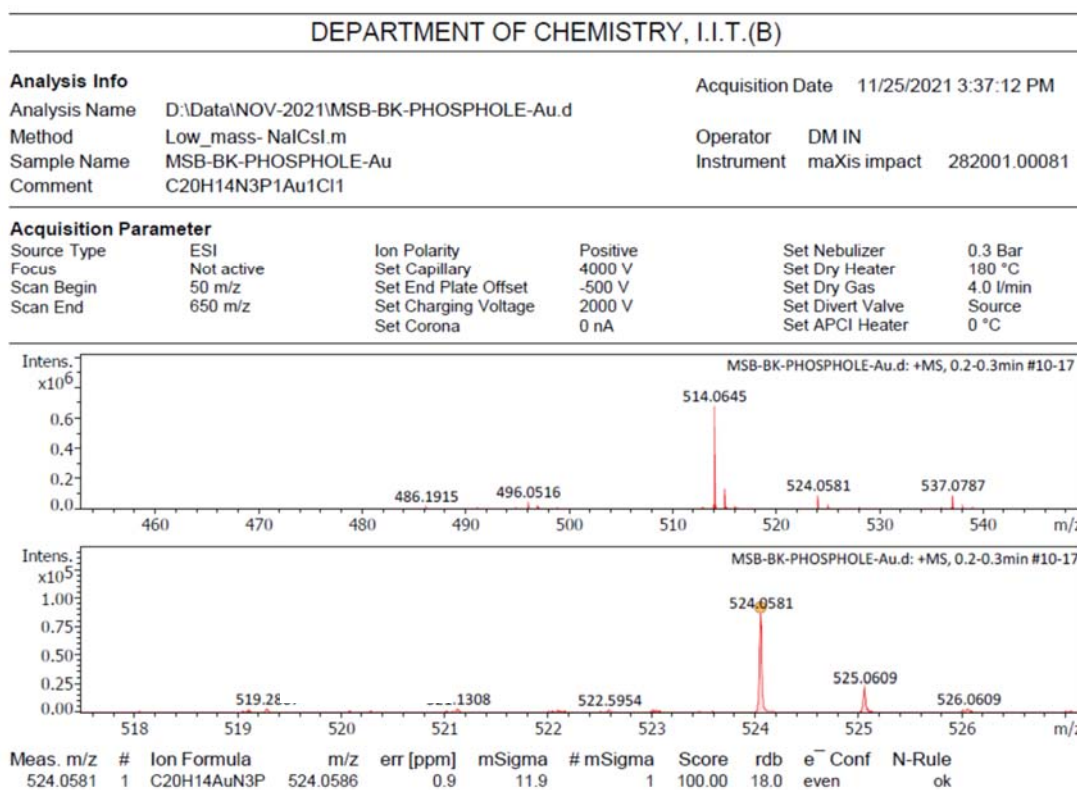

Fig. S47 HRMS spectrum of **7**.



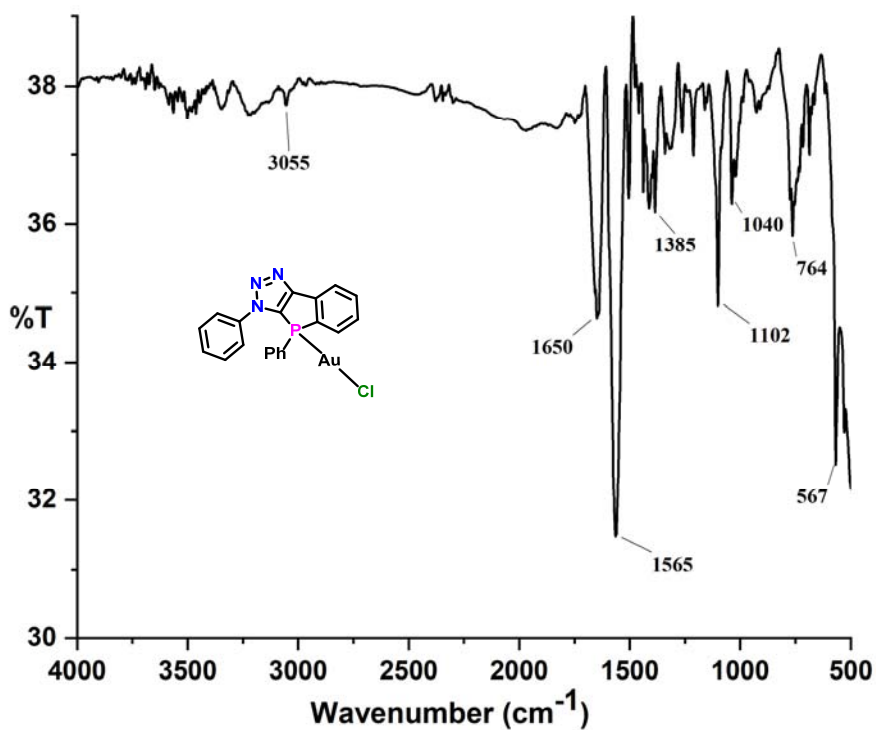

Fig. S48 FT-IR spectrum of compound 7.

### Controlled experiment

#### Procedure for the radical trapping experiment

Diphenylmethane (1.0 mmol), **1** (0.5 mol%), TBHP (4.0 mmol) and TEMPO (4.0 mmol) were added to 2 mL of CH<sub>2</sub>Cl<sub>2</sub> in a 5 mL reaction tube. The solution was stirred at room temperature for 2 h under open atmosphere. After the completion of reaction GC-MS analysis reveal the formation of benzyl alcohol-TEMPO adduct.

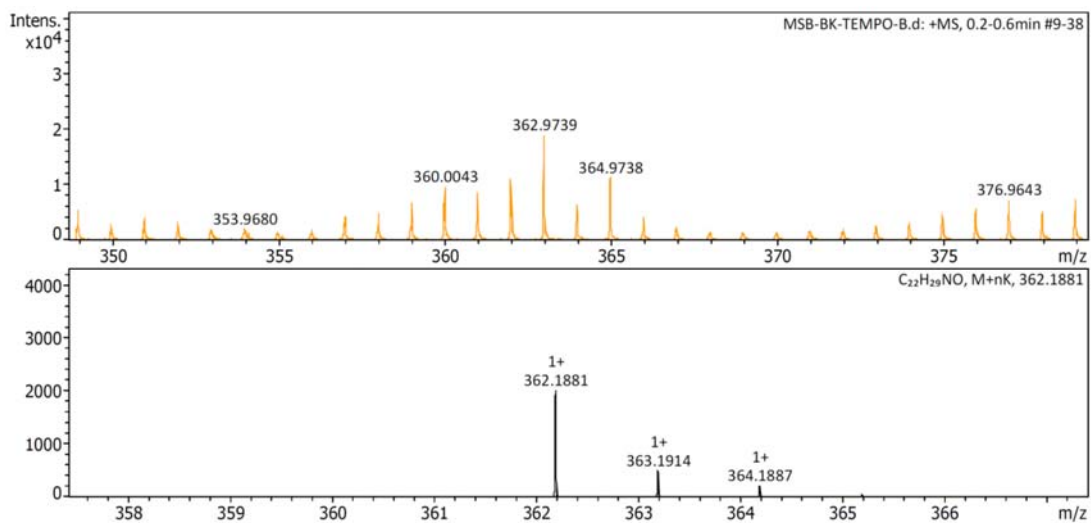

**Fig. S49** LRMS spectrum of the intermediate trapping by TEMPO.

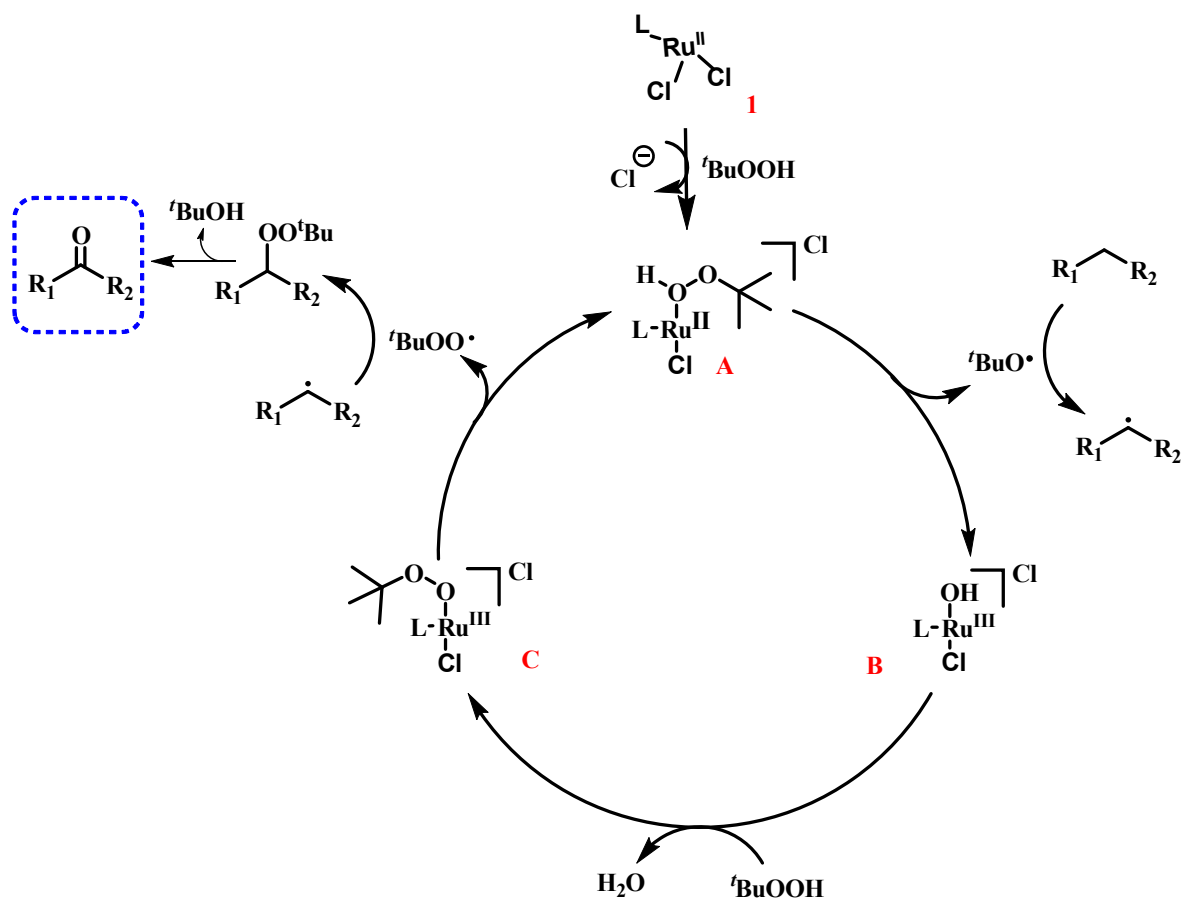

**Scheme S1** Plausible Ru<sup>II</sup>-catalyzed benzylic C–H oxidation cycle.

**Compound Details**

Cpd. 1: C12 H18 O2

| Formula    | m/z      | Observed M/Z     | Difference Da    | Difference PPM   | Score |
|------------|----------|------------------|------------------|------------------|-------|
| C12 H18 O2 | 195.0933 | 195.093346047651 | 1.33200001809541 | 6.86299377760672 | 80.68 |

**Compound Spectra (Zoomed)**

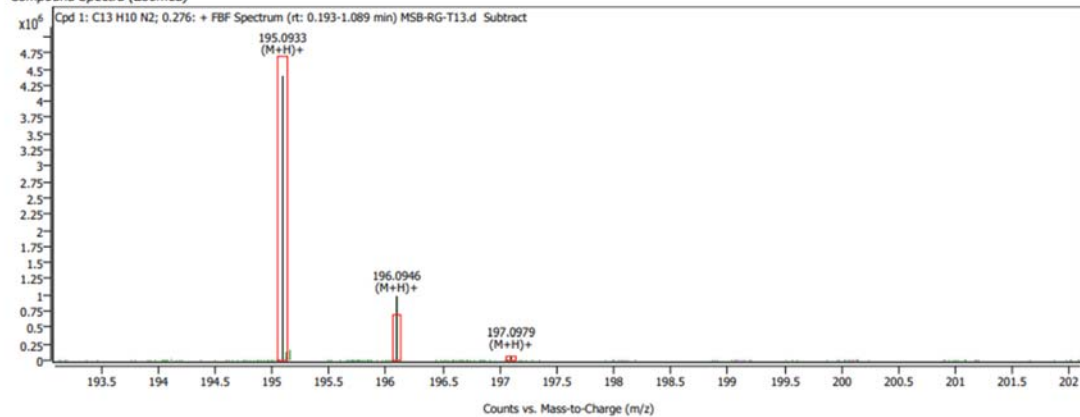

MassHunter Qual 10.0  
(End of Report)

**Fig. 50** LRMS for oxygenated intermediate

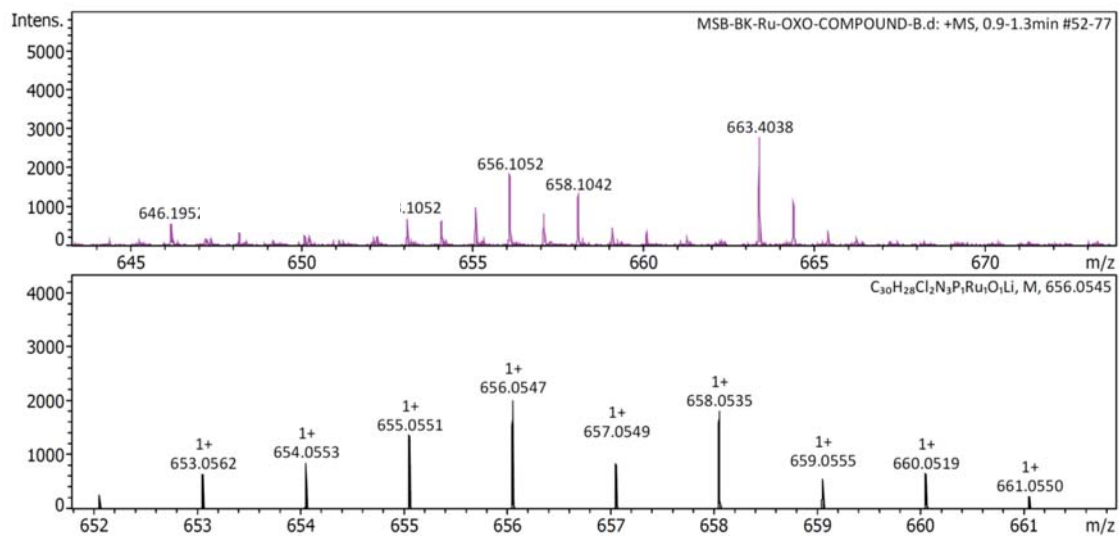

**Fig. 51** LRMS spectrum of the intermediate Ru<sup>III</sup> (B).

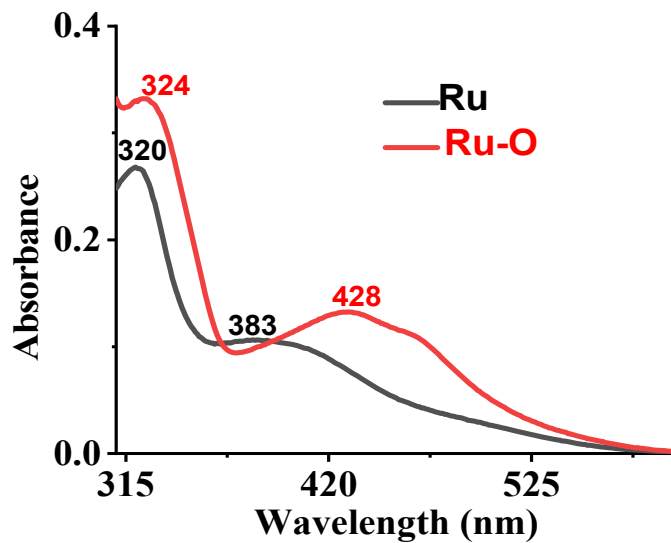

**Fig. 52** UV-Vis absorption spectrum of **1** ( $1 \times 10^{-5}$  M) with TBHP (0.1 mol/L) in  $\text{CH}_2\text{Cl}_2$  at rt changed the spectrum from  $\text{Ru}^{\text{II}}$  (black) to  $\text{Ru}^{\text{III}}$  (red).

## NMR spectra of catalytic products

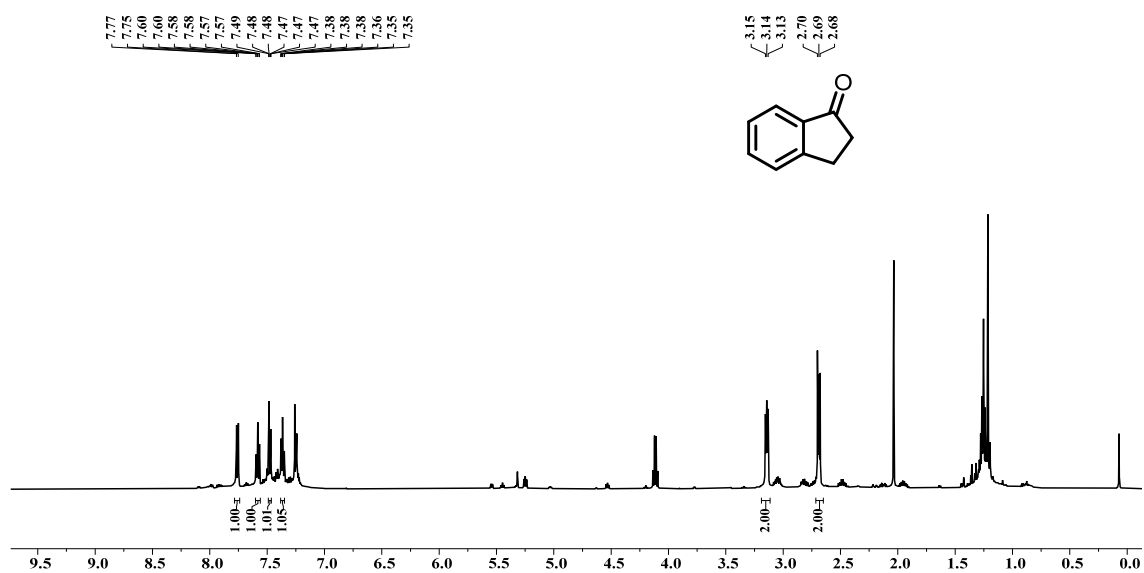

**Fig. S53** <sup>1</sup>H NMR spectrum of **1a** in CDCl<sub>3</sub> (500 MHz).

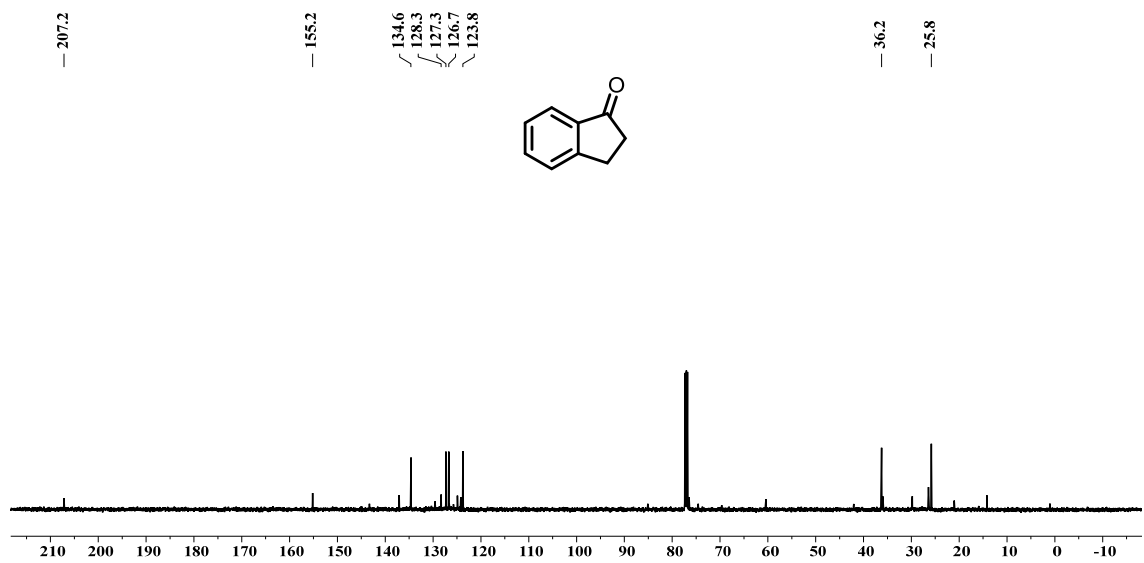

**Fig. S54** <sup>13</sup>C{<sup>1</sup>H} NMR spectrum of **1a** in CDCl<sub>3</sub> (126 MHz).

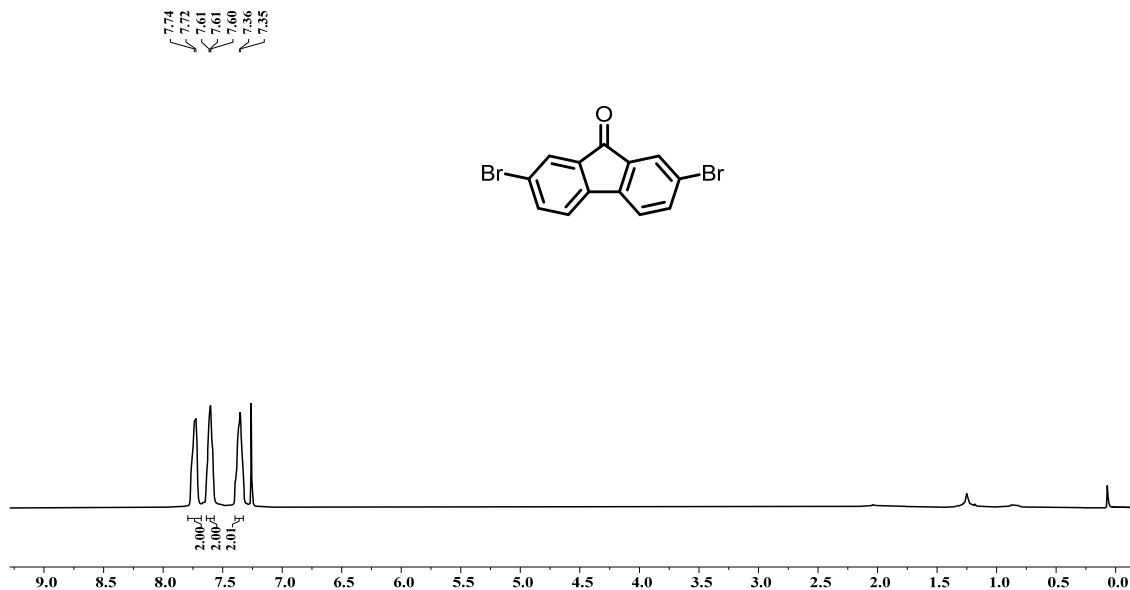

**Fig. S55** <sup>1</sup>H NMR spectrum of **1b** in CDCl<sub>3</sub> (400 MHz).

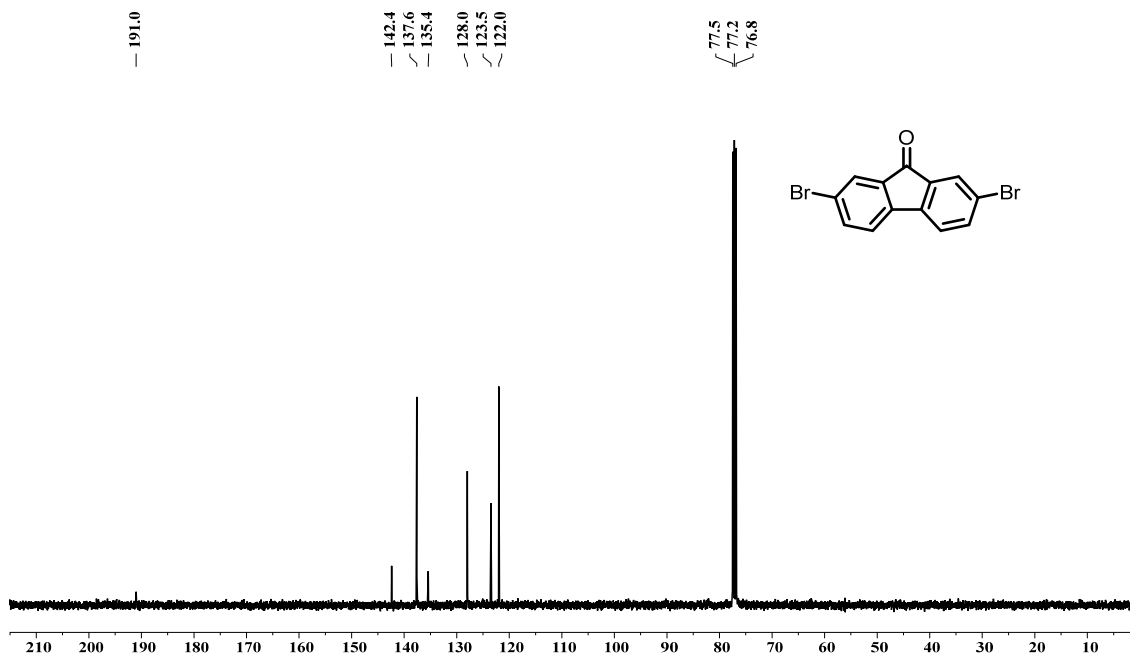

**Fig. S56** <sup>13</sup>C{<sup>1</sup>H} NMR spectrum of **1b** in CDCl<sub>3</sub> (101 MHz).

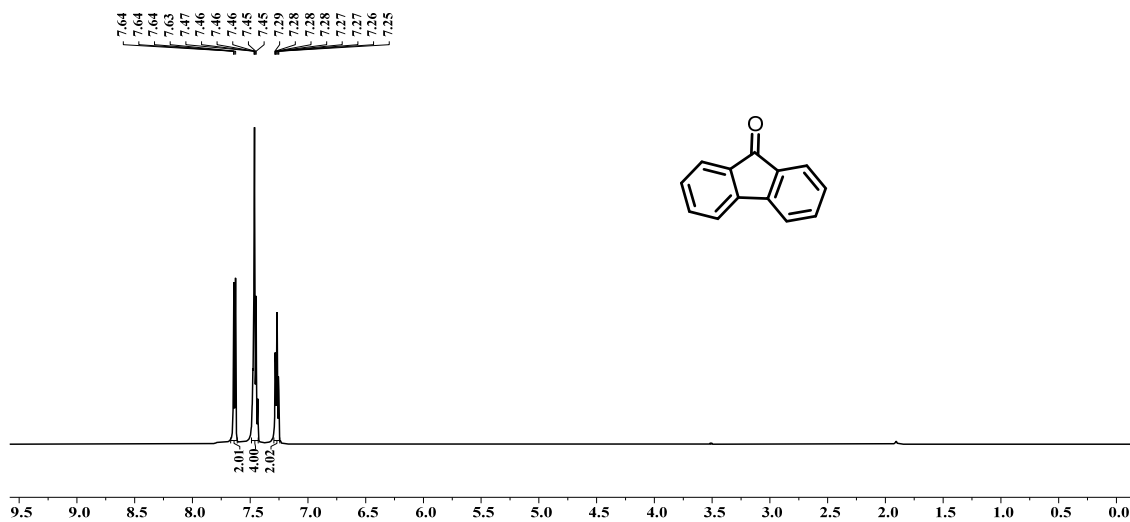

Fig. S57 <sup>1</sup>H NMR spectrum of **1c** in CDCl<sub>3</sub> (500 MHz).

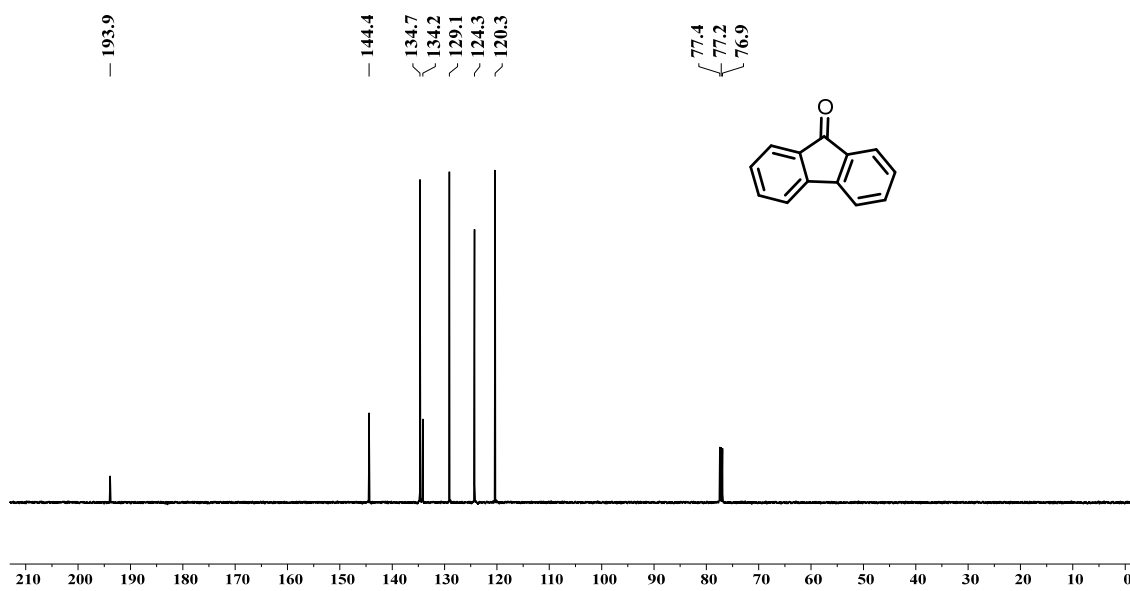

Fig. S58 <sup>13</sup>C {<sup>1</sup>H} NMR spectrum of **1c** in CDCl<sub>3</sub> (126 MHz).

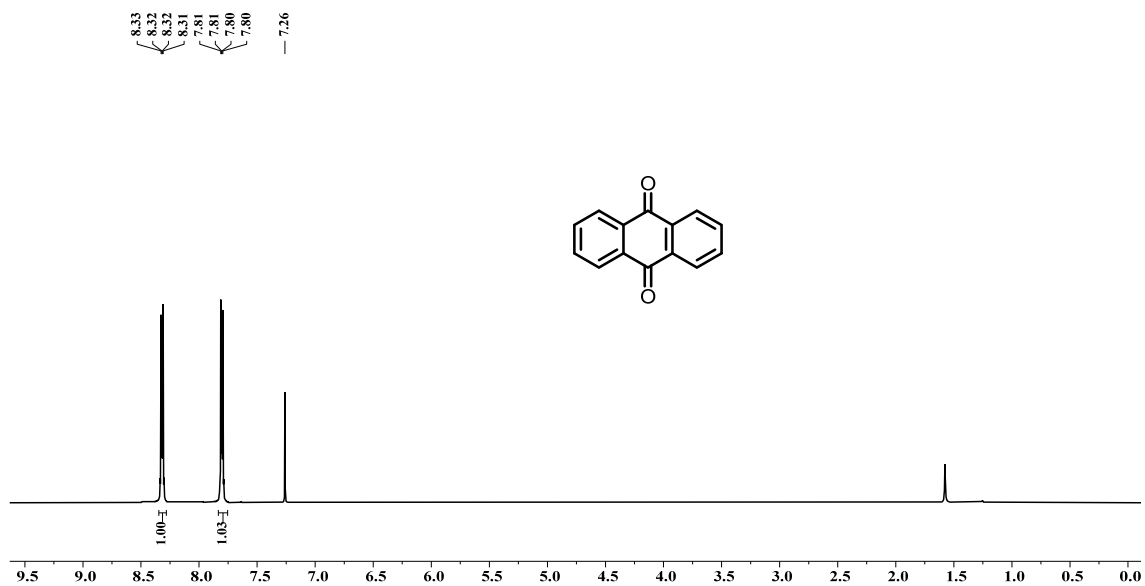

**Fig. S59**  $^1\text{H}$  NMR spectrum of **1d** in  $\text{CDCl}_3$  (500 MHz).

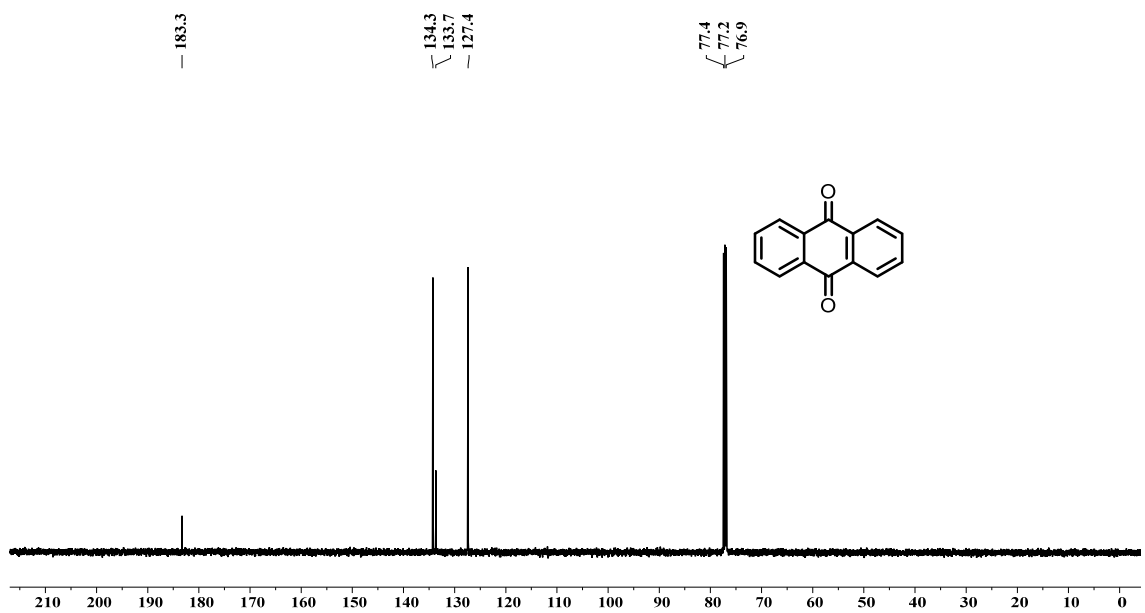

**Fig. S60**  $^{13}\text{C}\{^1\text{H}\}$  NMR spectrum of **1d** in  $\text{CDCl}_3$  (126 MHz).



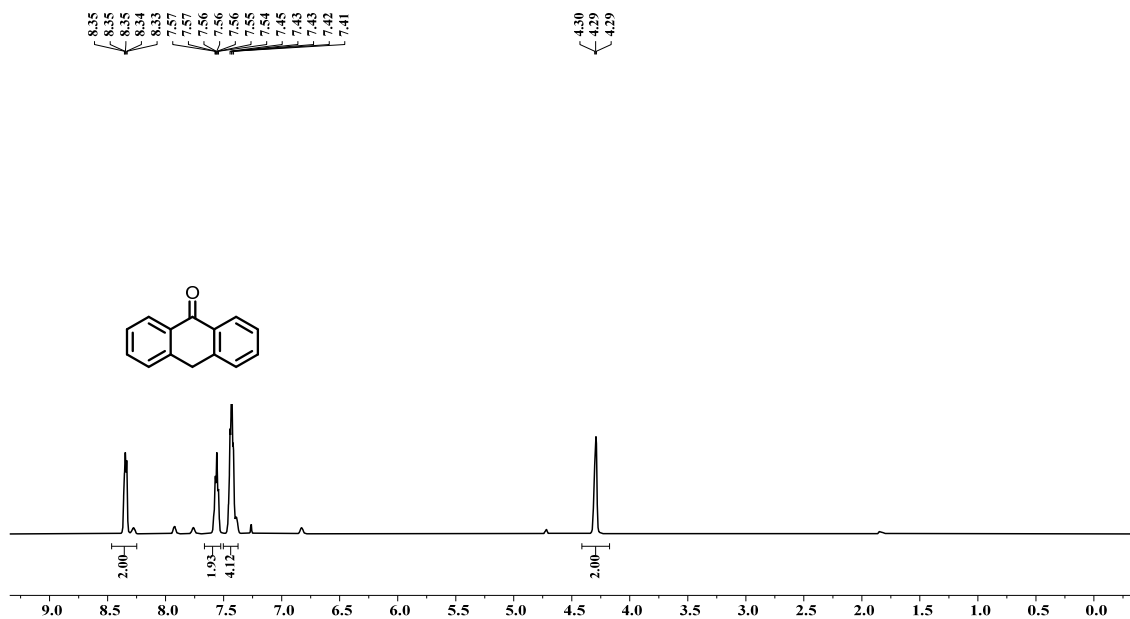

**Fig. S61**  $^1\text{H}$  NMR spectrum of **1e** in  $\text{CDCl}_3$  (500 MHz).

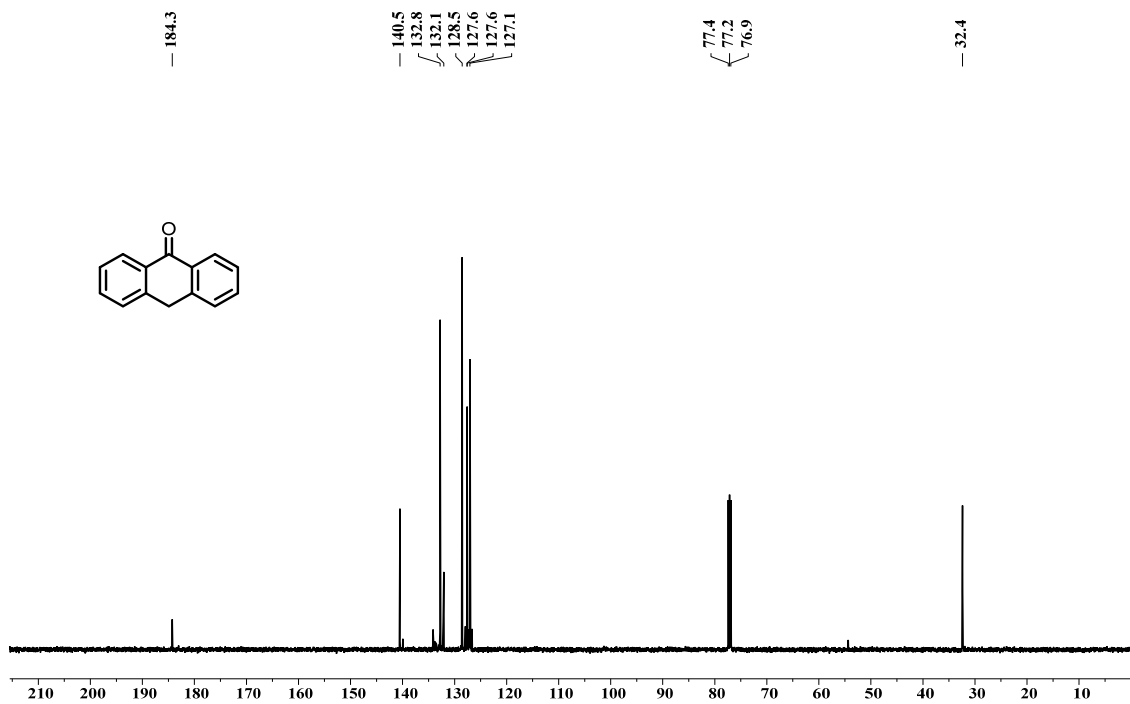

**Fig. S62**  $^{13}\text{C}\{^1\text{H}\}$  NMR spectrum of **1e** in  $\text{CDCl}_3$  (126 MHz).

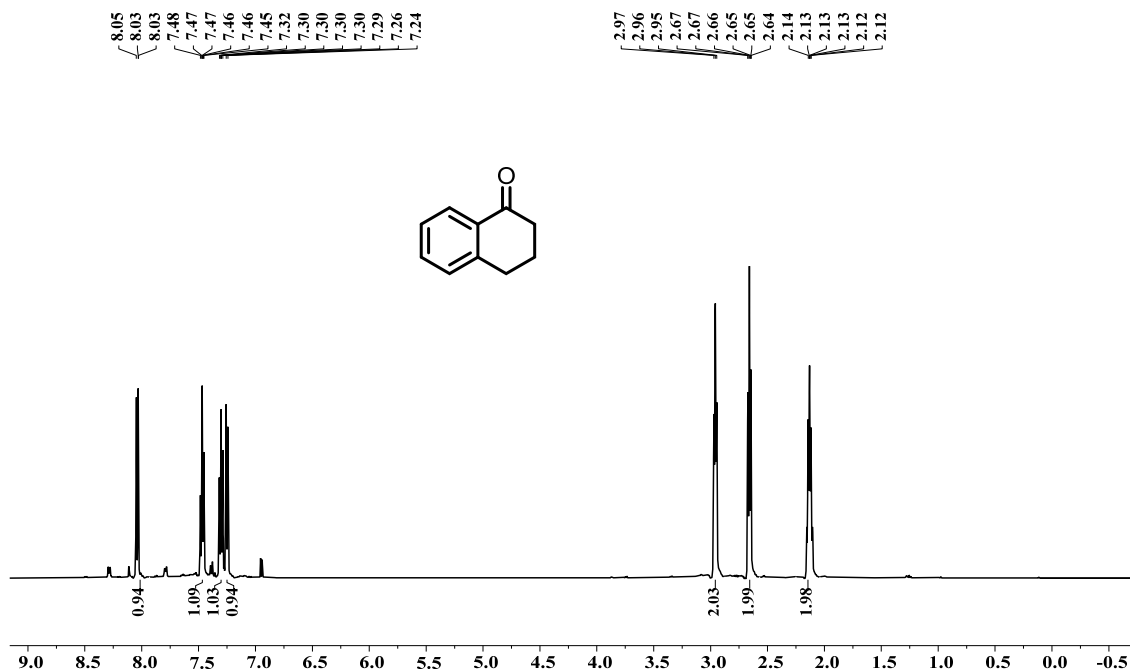

Fig. S63 <sup>1</sup>H NMR spectrum of **1f** in CDCl<sub>3</sub> (500 MHz).

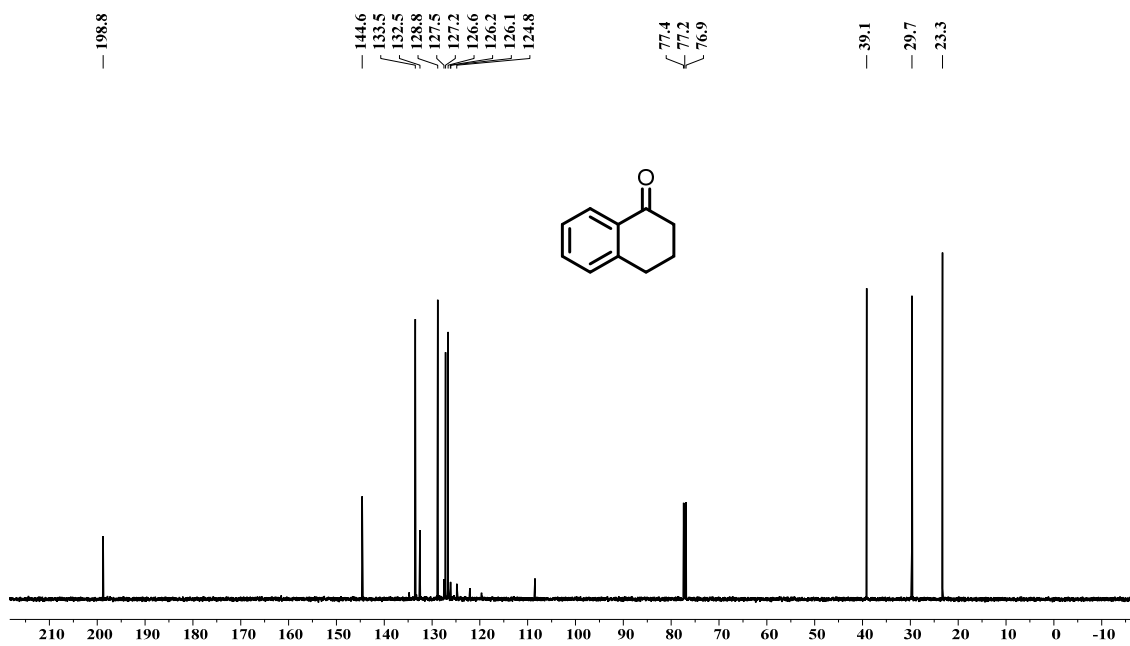

Fig. S64 <sup>13</sup>C{<sup>1</sup>H} NMR spectrum of **1f** in CDCl<sub>3</sub> (126 MHz).

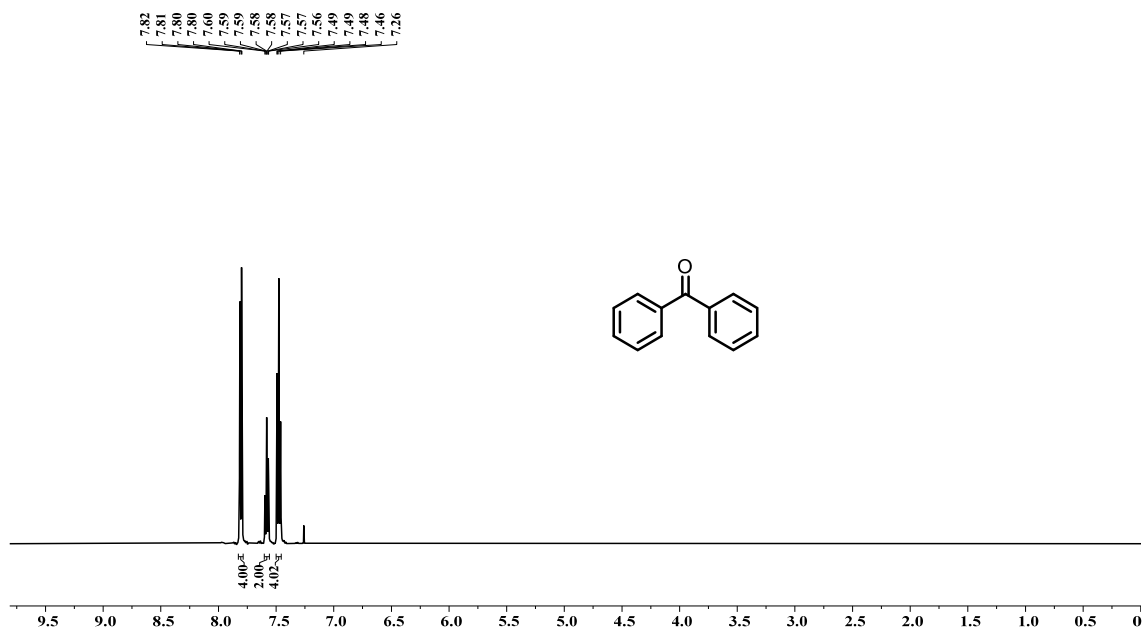

Fig. S65  $^1\text{H}$  NMR spectrum of **1g** in  $\text{CDCl}_3$  (500 MHz).

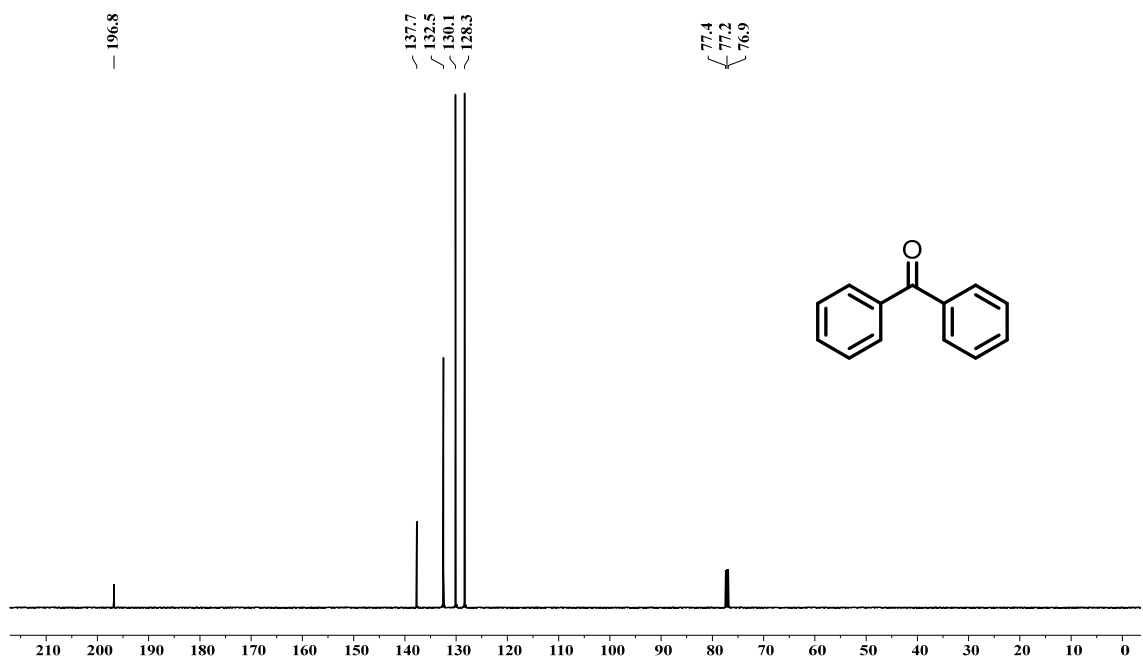

Fig. S66  $^{13}\text{C}\{^1\text{H}\}$  NMR spectrum of **1g** in  $\text{CDCl}_3$  (126 MHz).

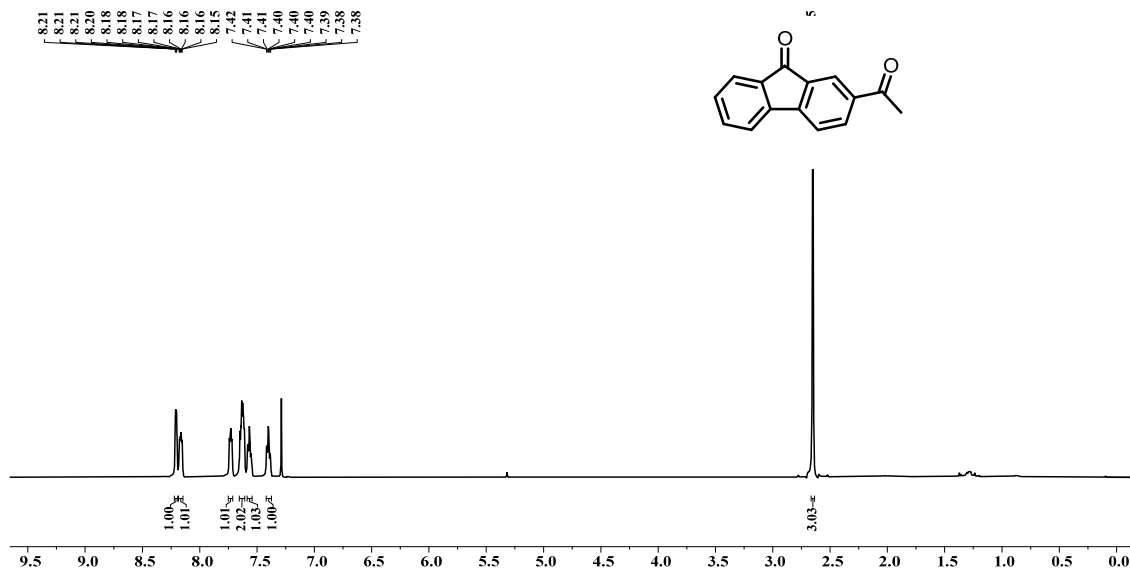

Fig. S67 <sup>1</sup>H NMR spectrum of **1i** in CDCl<sub>3</sub> (500 MHz).

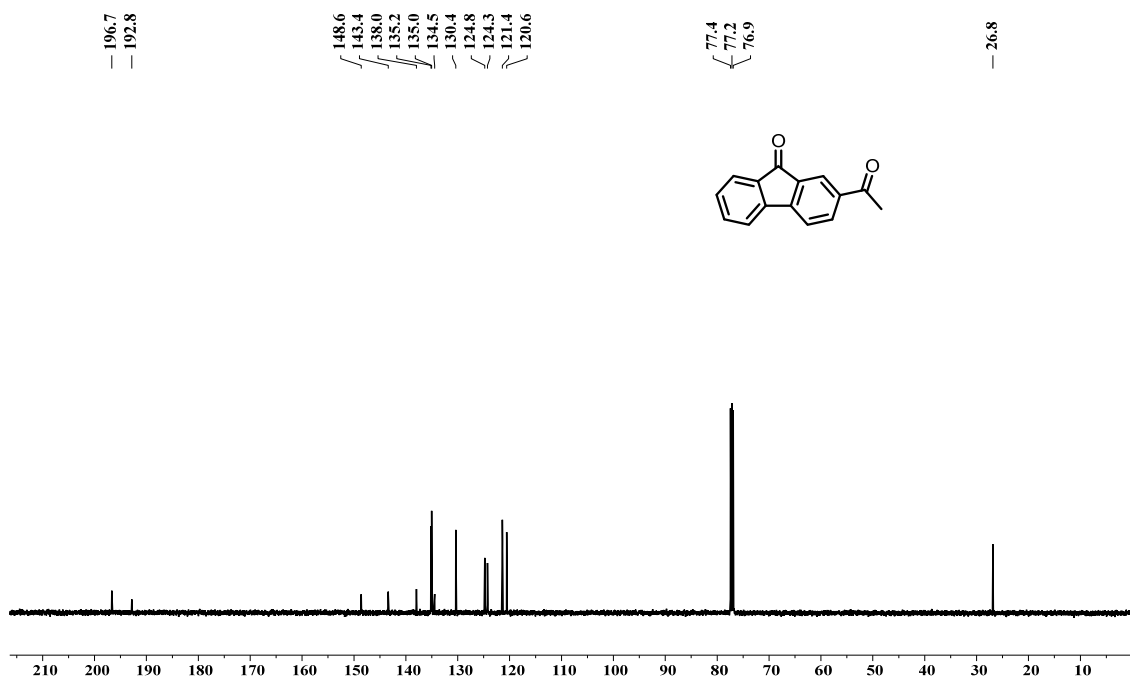

Fig. S68 <sup>13</sup>C{<sup>1</sup>H} NMR spectrum of **1i** in CDCl<sub>3</sub> (126 MHz).

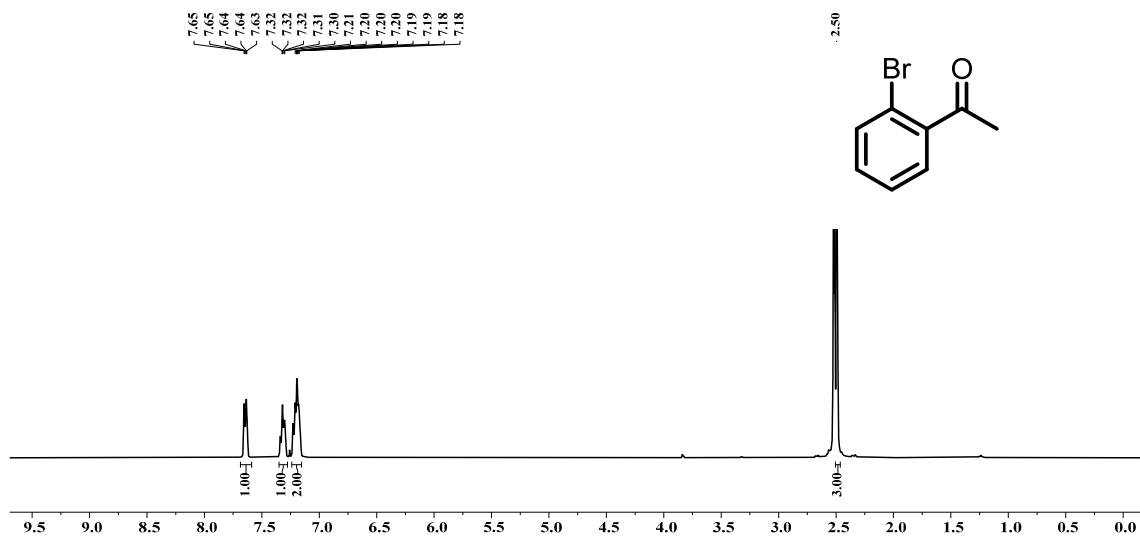

Fig. S69 <sup>1</sup>H NMR spectrum of **11** in CDCl<sub>3</sub> (400 MHz).

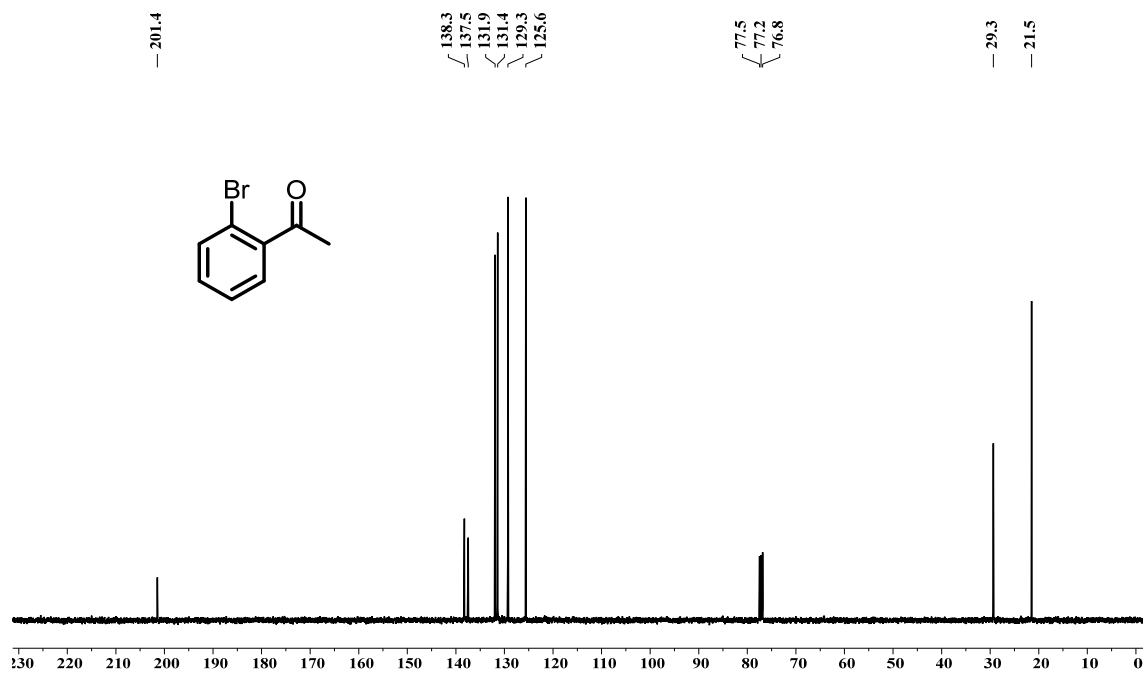

Fig. S70 <sup>13</sup>C{<sup>1</sup>H} NMR spectrum of **11** in CDCl<sub>3</sub> (101 MHz).

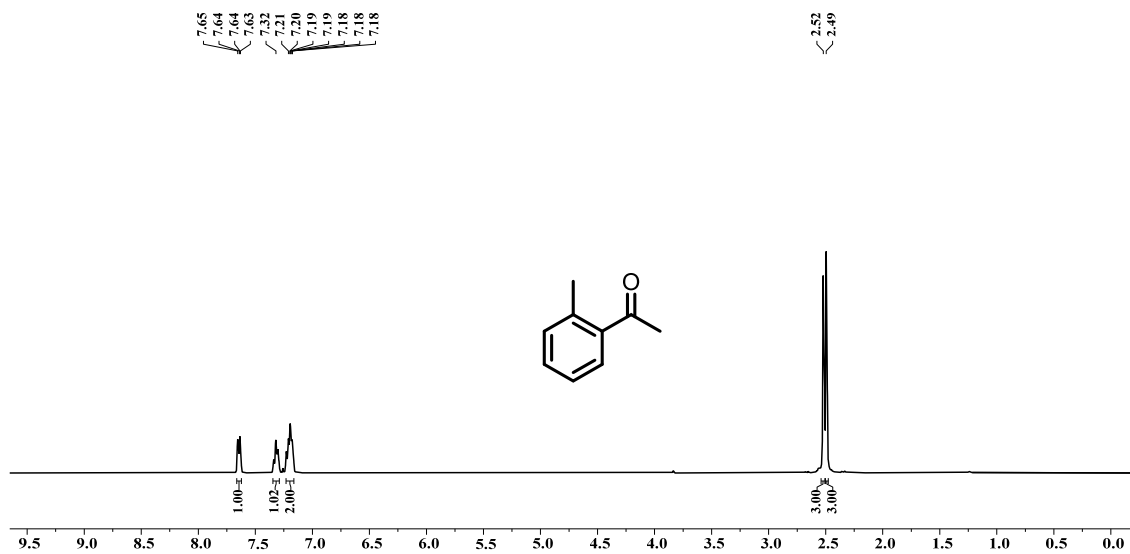

Fig. S71 <sup>1</sup>H NMR spectrum of **1m** in CDCl<sub>3</sub> (400 MHz).

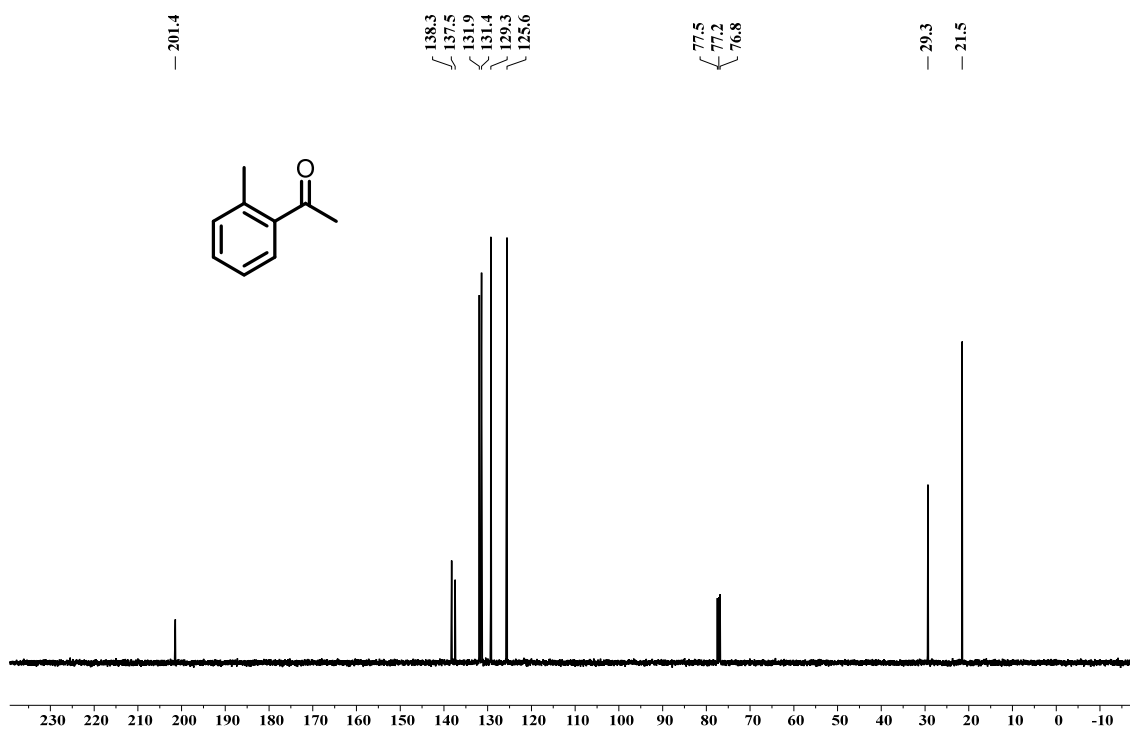

Fig. S72 <sup>13</sup>C{<sup>1</sup>H} NMR spectrum of **1m** in CDCl<sub>3</sub> (101 MHz).

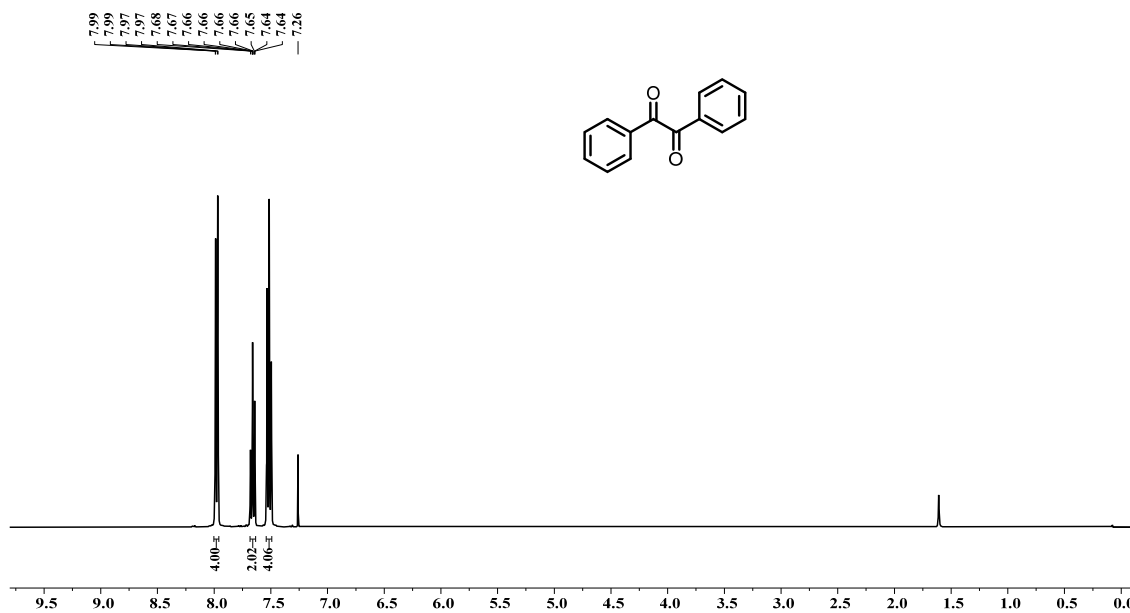

Fig. S73 <sup>1</sup>H NMR spectrum of **1n** in CDCl<sub>3</sub> (400 MHz).

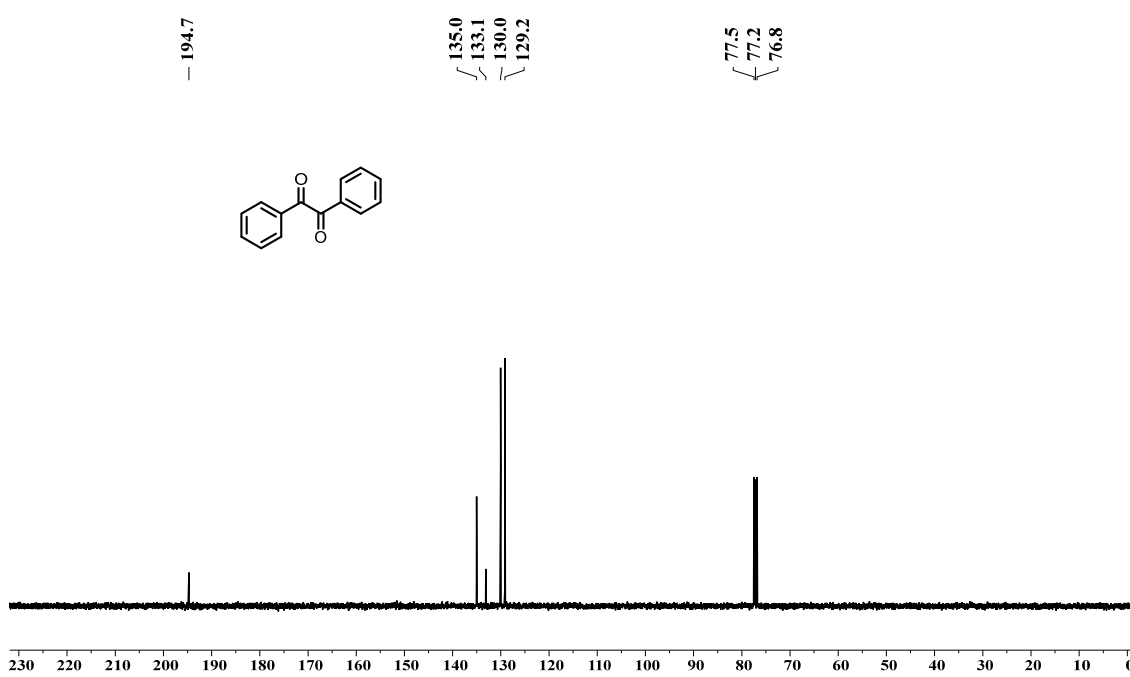

Fig. S74 <sup>13</sup>C {<sup>1</sup>H} NMR spectrum of **1n** in CDCl<sub>3</sub> (101 MHz).

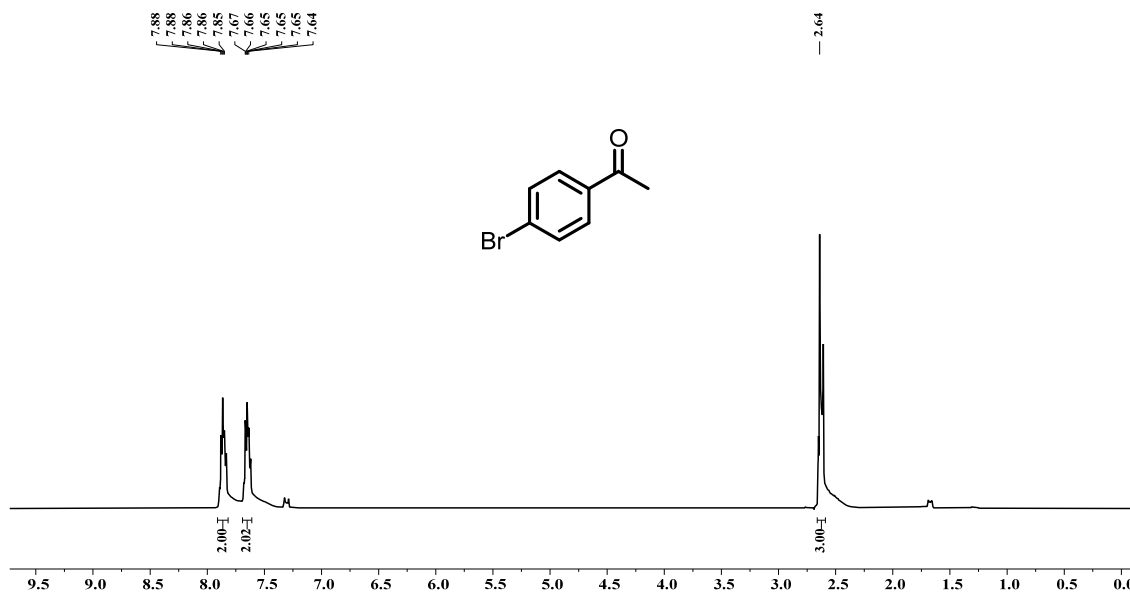

Fig. S75  $^1\text{H}$  NMR spectrum of **10** in  $\text{CDCl}_3$  (500 MHz).

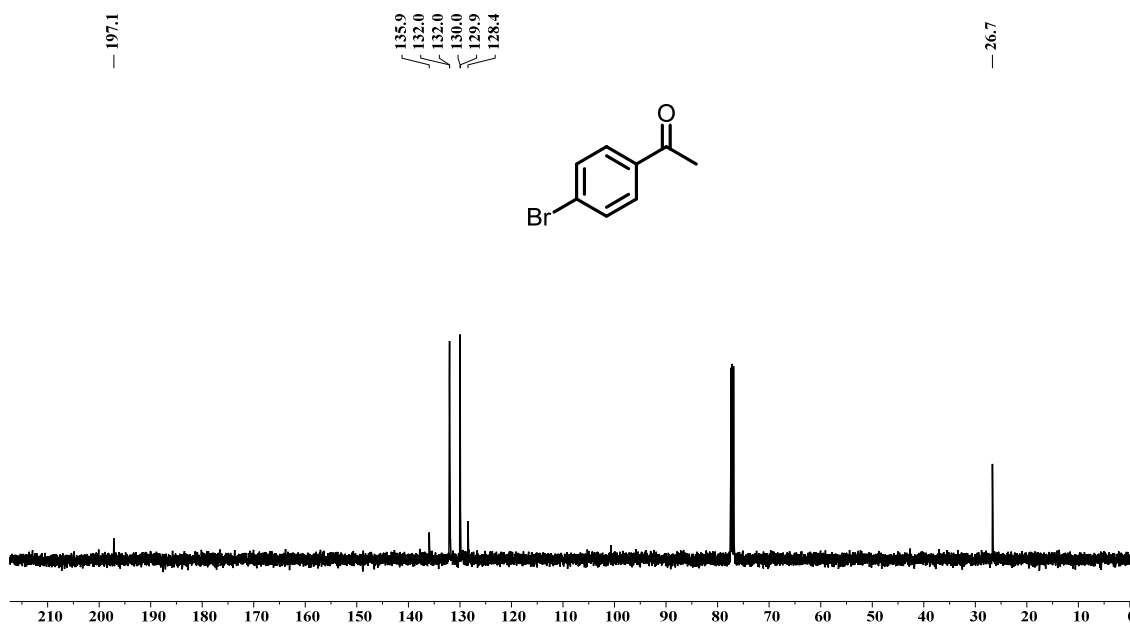

Fig. S76  $^{13}\text{C}\{^1\text{H}\}$  NMR spectrum of **10** in  $\text{CDCl}_3$  (126 MHz).



## References:

1. J. Jansa, T. Řezníček, L. Dostál, Z. Růžičková, F. Bureš and R. Jambor, *Appl. Organomet. Chem.*, 2016, **30**, 1036-1042.
2. a) G. Ferguson, R. McCrindle, A. J. McAlees and M. Parvez, *Acta Crystal.*, 1982, **B38**, 2679-2681; b) R. A. Baber, A. G. Orpen, P. G. Pringle, M. J. Wilkinson and R. L. Wingad, *Dalton Trans.*, 2005, 659-667.
3. a) D. V. Partyka, J. B. Updegraff Iii, M. Zeller, A. D. Hunter and T. G. Gray, *Dalton Trans.*, 2010, **39**, 5388-5397; b) S. A. Bhat, J. T. Mague and M. S. Balakrishna, *Dalton Trans.*, 2015, **44**, 17696-17703; c) S. Doherty, J. G. Knight, D. O. Perry, N. A. B. Ward, D. M. Bittner, W. McFarlane, C. Wills and M. R. Probert, *Organometallics*, 2016, **35**, 1265-1278.
